1 **Maintenance of spatial gene expression by Polycomb-mediated repression after formation of a**  
2 **vertebrate body plan**

3

4

5 **Authors:** Julien Rougeot<sup>1,2</sup>, Naomi D. Chrispijn<sup>1</sup>, Marco Aben<sup>1,2</sup>, Dei M. Elurbe<sup>1,2</sup>, Karolina M.  
6 Andralojc<sup>1</sup>, Patrick J. Murphy<sup>3</sup>, Pascal W.T.C. Jansen<sup>4</sup>, Michiel Vermeulen<sup>4</sup>, Bradley R. Cairns<sup>3</sup>, Leonie  
7 M. Kamminga<sup>1,2,\*</sup>

8 **Affiliations:** <sup>1</sup>Radboud University, Faculty of Science, Department of Molecular Biology, Radboud  
9 Institute for Molecular Life Sciences, Nijmegen, the Netherlands <sup>2</sup>Radboud University Medical  
10 Center, Department of Molecular Biology, Nijmegen, the Netherlands <sup>3</sup>Howard Hughes Medical  
11 Institute, Department of Oncological Sciences and Huntsman Cancer Institute, University of Utah  
12 School of Medicine, Salt Lake City, UT 84112, USA <sup>4</sup> Radboud University, Department of Molecular  
13 Biology, Faculty of Science, Radboud Institute for Molecular Life Sciences, Oncode Institute,  
14 Nijmegen, The Netherlands. \*Corresponding author.

15 **Contact information:**

16 Leonie Kamminga

17 Faculty of Science - Department of Molecular Biology

18 Geert Grooteplein 28

19 6525 GA Nijmegen

20 The Netherlands

21 Internal postal code 274

22 T +31 24 361 6850

23 [l.kamminga@science.ru.nl](mailto:l.kamminga@science.ru.nl)

24 **Abstract**

25 Polycomb group proteins are transcriptional repressors that are important regulators of cell fate  
26 during embryonic development. Among them, Ezh2 is responsible for catalyzing the epigenetic  
27 repressive mark H3K27me3 and is essential for animal development. The ability of zebrafish  
28 embryos lacking both maternal and zygotic *ezh2* to form a normal body plan provides a unique  
29 model to comprehensively study Ezh2 function during early development in vertebrates. By using a  
30 multi-omics approach, we found that Ezh2 is required for the recruitment of H3K27me3 and  
31 Polycomb group protein Rnf2. However, in absence of Ezh2, only minor changes in global H3K4me3  
32 levels and gene and protein expression occurred. These changes were mainly due to local  
33 deregulation of transcription factors outside their normal expression boundaries. Altogether, our  
34 results in zebrafish show that Polycomb-mediated gene repression is important only after the body  
35 plan is formed to maintain spatially restricted transcriptional profiles of Polycomb-targeted  
36 transcription factors.

37

## 38 Introduction

39 Development of multi-cellular organisms involves highly dynamic and controlled processes during  
40 which one single totipotent cell will multiply and differentiate into all the cells composing the adult  
41 individual. Specification of cell identity is controlled through the establishment of spatially and  
42 temporally restricted transcriptional profiles, which are subsequently maintained by epigenetic  
43 mechanisms(1). Epigenetic maintenance of gene expression can act through modifications of the  
44 chromatin, the complex of DNA wrapped around an octamer of histones H2A, H2B, H3, and H4 and  
45 its associated proteins and non-coding RNAs, creating an epigenetic landscape, often referred to as  
46 the epigenome(2). These modifications can be propagated from mother to daughter cells and  
47 thereby maintain gene expression profiles by controlling the accessibility of the DNA to the  
48 transcriptional machinery(3).

49 Important regulators of the epigenome during development are the Polycomb Group (PcG) proteins.  
50 First identified in *Drosophila melanogaster*, PcG proteins were found to maintain the pre-established  
51 pattern of *hox* gene expression(4). Subsequent studies showed that PcG proteins are important for  
52 proper patterning during early embryonic development, tissue-specific development, and  
53 maintenance of the balance between pluripotency and differentiation of stem cells in multiple  
54 species(5). Two main PcG complexes have been described(6). The Polycomb Repressive Complex 2  
55 (PRC2) is composed of the core subunits EZH1/2 (Enhancer of Zeste Homologue 1/2), SUZ12  
56 (Supressor of Zeste 12), and EED (Embryonic Ectoderm Development). EZH2 has a catalytically active  
57 SET domain that trimethylates lysine 27 of histone H3 (H3K27me3), an epigenetic mark associated  
58 with gene repression and found along gene coding sequences(7). The catalytic subunits of PRC2 are  
59 mutually exclusive and EZH1 is postulated to complement the function of EZH2 in non-proliferative  
60 adult organs(8, 9). H3K27me3 can be recognized by the Polycomb Repressive Complex 1 (PRC1). A  
61 diversity of PRC1 compositions has been described and canonical PRC1 is composed of the core  
62 subunits RING1/RNF2 (Ring Finger Protein 2 a/b), PCGF1-6 (Polycomb Group RING fingers 1-6), PHC

63 (Polyhomeotic), and CBX (Chromobox homolog)(10, 11). PRC1 catalyzes the ubiquitination of lysine  
64 119 of histone H2A (H2AK1119ub) and strengthens gene repression. In contrast to this canonical  
65 view, recent studies implicate that PRC1 is also active in the absence of PRC2(12-14).

66 Trithorax Group (TrxG) proteins antagonize PcG protein function through the deposition of a  
67 trimethyl group on lysine 4 of histone H3 (H3K4me3) on promoters and enhancers from virtually all  
68 transcribed genes(15-17). Acetylation of H3K27 (H3K27ac) is a different epigenetic mark associated  
69 with promoters and active enhancers and constitutes a dynamic signature marking developmentally  
70 regulated genes(18).

71 In mice, loss of PRC2 genes *Ezh2*, *EED*, or *Suz12* or PRC1 gene *Rnf2* leads to post-implantation  
72 embryonic lethality during early gastrulation(19-22), making it difficult to study transcriptional  
73 regulation by PcG complexes during early development. Lately, the zebrafish embryo has emerged  
74 as a model of choice to study developmental epigenetics in vertebrates, although epigenomics  
75 studies on mutant lines are still rare(23-26). Others and we previously showed that *ezh2* is essential  
76 for zebrafish development(27-29). More particularly, zebrafish embryos mutant for both maternal  
77 and zygotic *ezh2*, referred as *MZezh2* mutant embryos, develop seemingly normal until 1 dpf,  
78 forming a proper body plan. These mutants ultimately die at 2 dpf, exhibiting a 100% penetrant  
79 pleiotropic phenotype associated with a loss of tissue maintenance(28). This makes zebrafish  
80 *MZezh2* mutant embryos a unique model to study the function of *Ezh2* during early development,  
81 from fertilization to tissue specification, in the unique context of a vertebrate embryo in which  
82 trimethylation of H3K27 has never occurred, unlike cell culture, conditional, or zygotic mutant  
83 models.

84 We conducted a multi-omics approach in these *MZezh2* mutant embryos to study how PcG-  
85 mediated gene regulation controls axis formation and tissue specification. We focused our study on  
86 24 hours post fertilization (hpf) embryos, when the first phenotypes become visible, and the  
87 anterior-posterior patterning of the embryos is properly established. Surprisingly, our data show

88 that, despite the complete absence of PcG associated epigenetic mark and proteins, the  
89 transcriptional and proteomic profile in *MZezh2* mutant embryos remains largely unchanged  
90 compared to wildtype embryos. The changes mainly affect transcription factors essential for  
91 developmental processes. Closer analysis of spatial expression of the genes deregulated in *MZezh2*  
92 mutants revealed that aberrant gene expression is primarily local. Our results show that zebrafish  
93 embryo development is initially independent of PcG repression until the stage of tissue  
94 maintenance, where PcG proteins maintain precise spatial repression of transcription factor  
95 expression.

96

## 97 **Results**

### 98 **The repressive epigenetic mark H3K27me3 is absent in *MZezh2* embryos**

99 To study the function of Ezh2 during development, we used the *ezh2* nonsense mutant allele  
100 *ezh2(hu5670)* containing a premature stop codon within the catalytic SET domain and resulting in  
101 the absence of Ezh2 protein(28). Elimination of both maternal and zygotic contribution of Ezh2, by  
102 using the germ cell transplantation technique described previously(28, 30), allowed us to study the  
103 function of Ezh2 during early development. As previously shown, *MZezh2* mutant embryos display  
104 normal body plan formation and a mild phenotype at 24 hpf. They die at 48 hpf, at which point  
105 pleiotropic phenotypes are observed, such as smaller eyes, smaller brain, blood coagulation, and  
106 absence of pectoral fins (Figure. 1A). Western Blot analysis at 3.3 hpf and 24 hpf confirmed the  
107 absence of both maternal and zygotic Ezh2 in these mutants, respectively (Figure 1B).

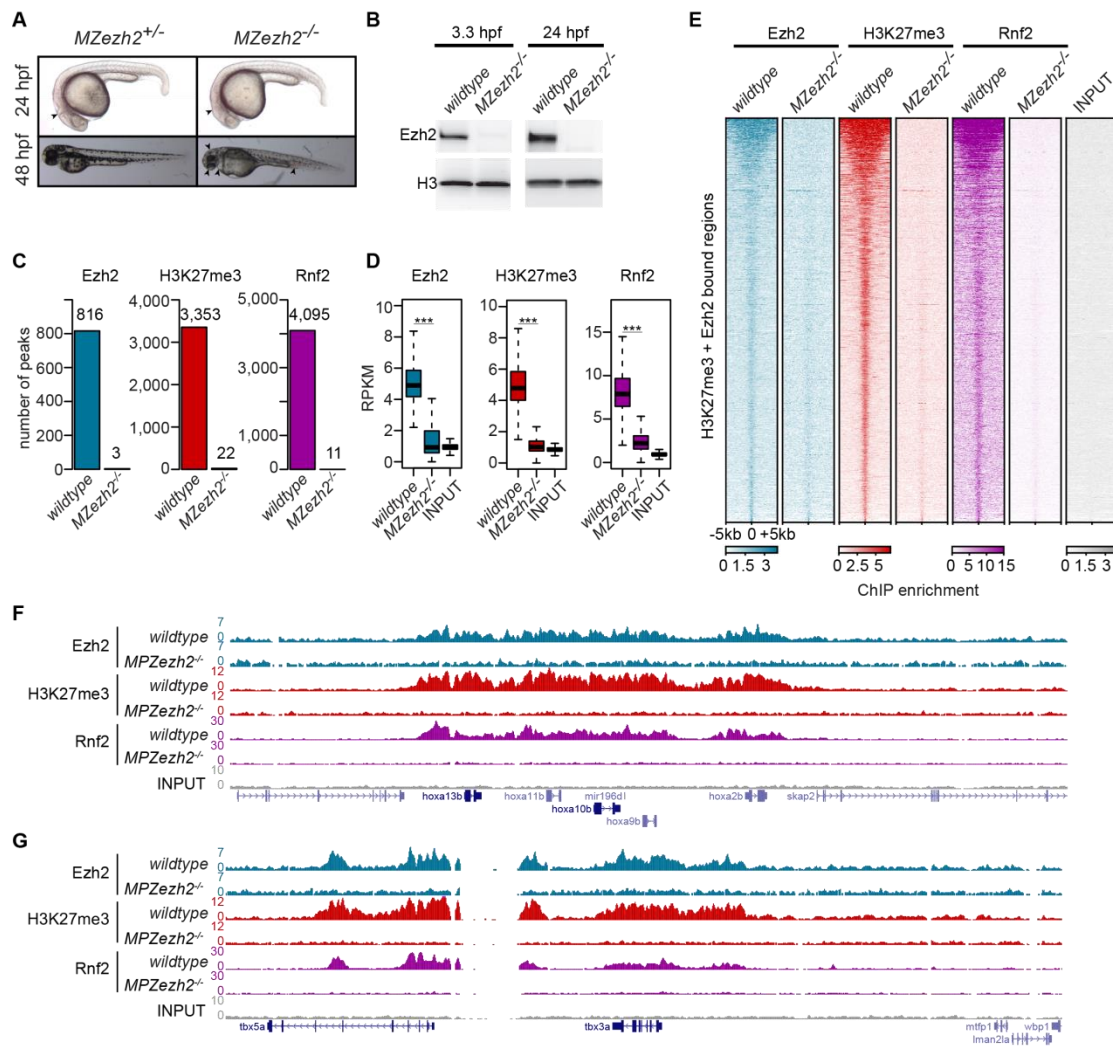

108

Rougeot\_Fig. 1

109 **Figure 1. *MZezh2* mutant (*MZezh2*<sup>-/-</sup>) embryos lack Ezh2, H3K27me3, and Rnf2 binding to the**  
 110 **chromatin. (A) *MZezh2*<sup>+/-</sup> (developing as wildtype embryos) and *MZezh2*<sup>-/-</sup> embryos at 24 and 48 hpf.**  
 111 **At 24 hpf, *MZezh2*<sup>-/-</sup> embryos lack a clear mid-hindbrain boundary compared to heterozygous**  
 112 **embryos (arrow head). At 48 hpf, *MZezh2*<sup>-/-</sup> embryos showed pleiotropic phenotypes compared to**  
 113 **heterozygous embryos, such as small eyes, small brain, heart edema, and blood accumulation in the**  
 114 **blood island (arrow heads). (B) Western blot analysis of Ezh2 at 3.3 hpf and 24 hpf of wildtype and**  
 115 ***MZezh2*<sup>-/-</sup> embryos. Histone H3 was used as a loading control. (C) Number of peaks called after Ezh2,**  
 116 **H3K27me3, and Rnf2 ChIP-seq of wildtype and *MZezh2*<sup>-/-</sup> embryos at 24hpf. Each peak set was**  
 117 **obtained by the intersection of two independent biological replicates, with the exception of Rnf2**

118 (one replicate). **(D)** Box plots of Ezh2, H3K27me3, and Rnf2 RPKM-normalized coverage after  
119 respective ChIP-seq in wildtype and in *MZezh2*<sup>-/-</sup> embryos at 24 hpf. The input control shown was  
120 obtained from wildtype embryos at 24 hpf. Coverages were calculated based on positions of peaks  
121 detected in wildtype embryos. t-test: \*\*\* *P*-value < 0.001. **(E)** Heatmaps for Ezh2, H3K27me3, and  
122 Rnf2 RPKM-normalized coverage after ChIP-seq in 24 hpf wildtype and *MZezh2*<sup>-/-</sup> embryos. Windows  
123 of 10 kb regions for all H3K27me3 or Ezh2 peaks in 24 hpf wildtype embryos are shown. The input  
124 track obtained from 24 hpf wildtype embryos was used as control. **(F, G)** UCSC browser snapshot  
125 depicting the loss of Ezh2, H3K27me3, and Rnf2 after ChIP-seq in 24 hpf *MZezh2*<sup>-/-</sup> embryos  
126 compared to wildtype embryos for **(F)** the *hoxab* gene cluster and **(G)** *tbx5a*. Colors represent ChIP-  
127 seq for different proteins with blue: Ezh2, red: H3K27me3, purple: Rnf2, and grey: Input control.

128

129 To further confirm the absence of Ezh2 in *MZezh2* mutants and assess its effect on H3K27me3  
130 deposition, we performed ChIP-sequencing (ChIP-seq) for Ezh2 and H3K27me3 at 24 hpf in both  
131 wildtype and *MZezh2* mutant embryos. ChIP-seq analyses for Ezh2 and H3K27me3 revealed 816 and  
132 3,353 peaks in wildtype embryos, respectively (Figure 1C,D, Supplementary Table 1). Although the  
133 number of peaks differed between the two proteins, their binding profiles greatly overlap (Figure  
134 1C). Quantification showed that 84.6% of Ezh2 peaks also contain H3K27me3 (Supplementary Figure  
135 1A). Known PcG target genes such as the *hoxab* gene cluster, *tbx* genes, and *gsc* presented similar  
136 binding profiles for Ezh2 as for H3K27me3 (Figure 1F,G, Supplementary Figure 1B), whereas the  
137 ubiquitously expressed genes *eif1ad* and *tbp* showed absence of Ezh2 and H3K27me3  
138 (Supplementary Figure 1B).

139 In *MZezh2* mutant embryos, the binding of Ezh2 and H3K27me3, as detected by ChIP-seq, was  
140 virtually absent, with 3 and 22 peaks detected for Ezh2 and H3K27me3, respectively (Figure 1C).  
141 Manual inspection of these remaining peaks revealed that they are present in gene deserts and low  
142 complexity regions and are probably artefacts (Supplementary Figure 1C). Ezh2 and H3K27me3

143 coverage was reduced to background levels in *MZezh2* mutants compared to wildtype (Figure 1C).

144 Finally, the *hoxab* gene cluster, *tbx3a*, *tbx5a*, *gsc*, and *isl1* loci, targeted by PcG repression in

145 wildtypes, also showed a complete absence of Ezh2 and H3K27me3 binding in *MZezh2* mutants

146 (Figure 1F,G, Supplementary Figure 1B).

147 Altogether, these results demonstrate that the absence of maternal and zygotic Ezh2 results in a

148 complete absence of Ezh2 and H3K27me3 from chromatin.

149

### 150 **Loss of PRC2-mediated repression results in loss of PRC1 recruitment during early development**

151 It is postulated that PRC1 is recruited to chromatin by PRC2-deposited H3K27me3 but can also have

152 a function independent of PRC2(12-14). As both Ezh2 and H3K27me3 are absent from *MZezh2*

153 mutant embryos, we investigated whether PRC1 is still recruited to chromatin in these mutants. In

154 zebrafish, Rnf2 is the only catalytic subunit of PRC1(31). ChIP-seq for Rnf2 in wildtype embryos at 24

155 hpf reveals 4,095 peaks (Figure 1C, Supplementary Table 1) which are present at Ezh2 and

156 H3K27me3 positive regions (Figure 1E). We found that 84.9% of Ezh2 peaks were also positive for

157 Rnf2 in wildtype embryos (Supplementary Figure 1A).

158 In *MZezh2* mutant embryos, only 11 binding sites could be detected for Rnf2 (Figure 1C) and Rnf2

159 average binding (RPKM) was reduced to background level, as observed for Ezh2 and H3K27me3

160 binding (Figure 1C,E). This loss of Rnf2 was observed at both gene clusters such as *hoxab* (Figure 1F)

161 and individual transcription factors such as *tbx3a*, *tbx5a*, and *gsc* (Figure 1G, Supplementary Figure

162 1B). As for Ezh2 and H3K27me3, Rnf2 remaining peaks in *MZezh2* mutant embryos were detected in

163 intergenic regions with repeat sequences and are probably artefacts (Supplementary Figure 1C).

164 Thus, the loss of PRC2 binding and H3K27me3 deposition in *MZezh2* mutant embryos is associated

165 with a complete loss of Rnf2 on the chromatin.



166

167 **Loss of H3K27me3 in *MZezh2* mutant embryos induces gene specific gain of H3K4me3**

168 As PcG and TrxG complexes are known to have an antagonistic effect on gene expression(32), we  
169 investigated whether the loss of H3K27me3 in *MZezh2* mutant embryos changed the deposition  
170 H3K4me3, a mark associated with gene activation.

171 To this aim, we performed ChIP-seq for H3K4me3 in both wildtype and *MZezh2* mutant embryos at  
172 24 hpf. In total, 11,979 H3K4me3 peaks were detected in wildtype embryos, and 13,401 in *MZezh2*  
173 mutants (Figure 2A, Supplementary Table 1). A majority of 11,710 peaks were shared between  
174 wildtype and *MZezh2* mutant embryos, whereas 1,691 were specific for *MZezh2* mutants and 269  
175 peaks for wildtype embryos (Figure 2A,B). Comparison of the RPKM-normalized H3K4me3 binding  
176 levels between *MZezh2* mutant and wildtype embryos showed an overall increase in H3K4me3  
177 enrichment upon loss of *Ezh2* on the peak locations shared among them (Figure 2B,C). The wildtype  
178 specific peak locations presented no difference in RPKM coverage between wildtype and *MZezh2*  
179 mutant embryos (Figure 2B). Detection of these wildtype-specific peaks could therefore be explained  
180 by the limitation of the peak detection algorithm in accurately identifying low enriched regions,  
181 rather than being true wildtype-specific peaks. In contrast, in *MZezh2* mutant embryos, mutant-  
182 specific peak locations showed a significant increase in H3K4me3 enrichment level compared to  
183 wildtype embryos (Figure 2B). Finally, the binding intensity on the mutant specific H3K4me3 peak  
184 locations remained relatively low in *MZezh2* mutant embryos and never reached the enrichment  
185 level detected on the H3K4me3 peak locations shared by wildtype and *MZezh2* mutants (Figure  
186 2B,C).

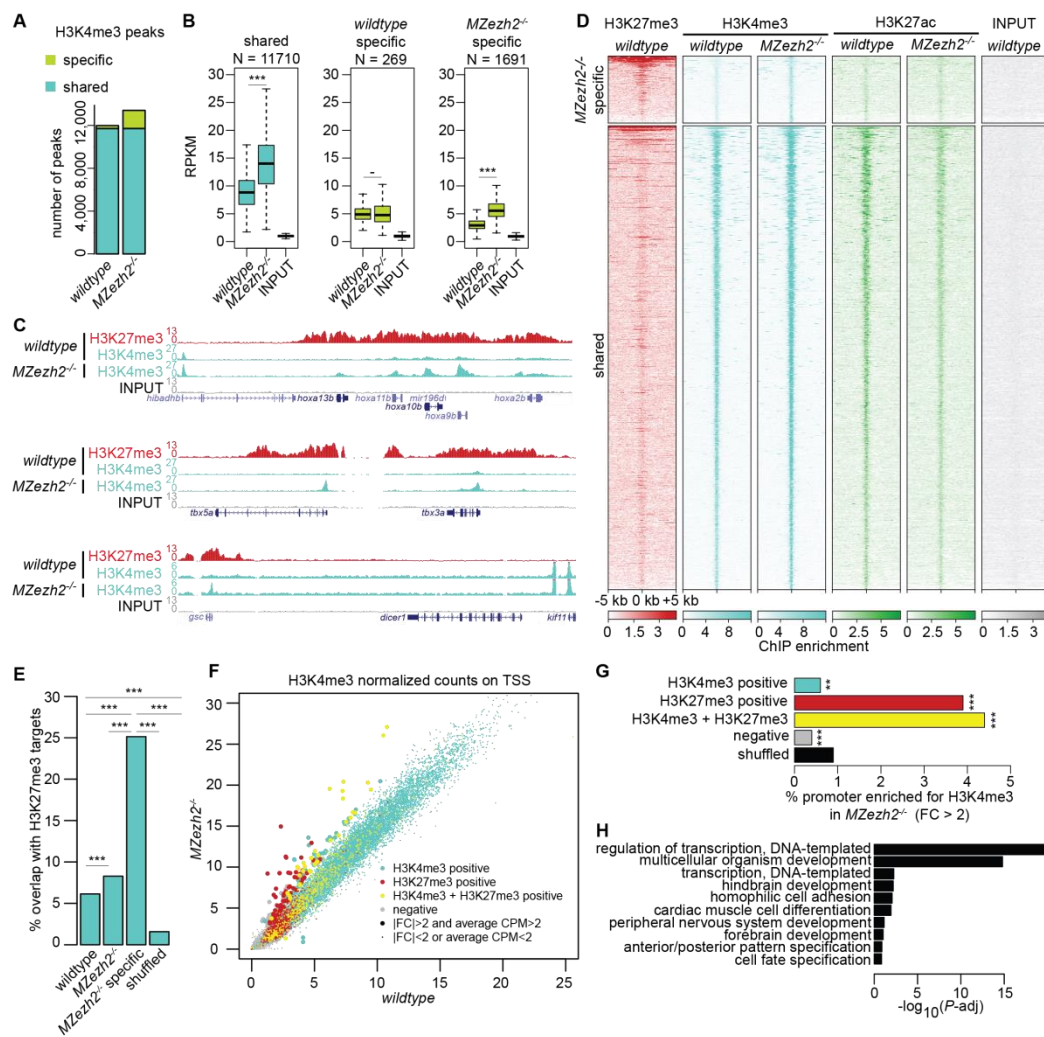

187

Rougeot\_Fig. 2

188 **Figure 2. *MZezh2* mutant (*MZezh2*<sup>-/-</sup>) embryos show an increase in H3K4me3 preferentially on**  
 189 **H3K27me3 targets. (A)** Number of peaks called after H3K4me3 ChIP-seq in wildtype and *MZezh2*<sup>-/-</sup>  
 190 embryos at 24 hpf. Turquoise and green represent peaks shared by the two conditions and peaks  
 191 specific for one condition, respectively. **(B)** Box plots of H3K4me3 RPKM-normalized coverage after  
 192 ChIP-seq in wildtype and in *MZezh2*<sup>-/-</sup> embryos at 24 hpf. Colors are similar to **(A)**. t-test: \*\*\* *P*-value  
 193 < 0.001. **(C)** UCSC browser snapshots of three genomic loci in wildtype and *MZezh2*<sup>-/-</sup> embryos at 24  
 194 hpf. Red, turquoise, and grey represent ChIP-seq for H3K27me3, H3K4me3, and Input control,  
 195 respectively. **(D)** Heatmaps of RPKM-normalized coverage after ChIP-seq for H3K27me3 in wildtype  
 196 embryos and H3K4me3 and H3K27ac in wildtype and *MZezh2*<sup>-/-</sup> embryos at 24 hpf. Heatmaps display

197 *MZezh2*<sup>-/-</sup> specific peaks and peaks shared by both wildtype and *MZezh2*<sup>-/-</sup> embryos. The input track  
198 obtained from 24 hpf wildtype embryos was used as control. Red, turquoise, green, and grey  
199 represent ChIP-seq for H3K27me3, H3K4me3, H3K27ac, and Input control, respectively. (E)  
200 Percentage of H3K4me3 peaks (+/- 2kb window) showing an overlap with H3K27me3 enriched peaks  
201 in 24 hpf wildtype embryos. Selected peak sets are peaks detected at 24 hpf in wildtype embryos, in  
202 *MZezh2*<sup>-/-</sup> embryos, specifically in *MZezh2* mutant embryos (*MZezh2*<sup>-/-</sup> specific), and a random set of  
203 13,626 peaks as control (shuffled). Bonferroni-corrected  $\chi^2$ : \*\*\* *P*-value < 0.001. (F) Scatter plot  
204 showing H3K4me3 Count Per Million (CPM) on all transcriptional start sites (TSS) in *MZezh2*<sup>-/-</sup>  
205 embryos as a function of H3K4me3 CPM in wildtype embryos at 24 hpf. Turquoise, red, yellow, and  
206 grey dots represent a +/- 2 kb window around TSS positive for H3K4me4, positive for H3K27me3,  
207 double positive for H3K4me3 and H3K27me3, and double negative within in 24 hpf wildtype,  
208 respectively. (G) Percentage of TSS positive for H3K4me3 in *MZezh2*<sup>-/-</sup> embryos compared to  
209 wildtype ( $|FC| \geq 2$  and average CPM  $\geq 2$ ). TSS sets and colors are identical to (F).  $\chi^2$ : \*\*\* *P*-value <  
210 0.001, \*\* *P*-value < 0.01. (H) Gene Ontology analysis of the closest genes restricted two 2kb  
211 upstream or downstream from *MZezh2*<sup>-/-</sup> specific H3K4me3 peaks.

212

213 We next assessed if the H3K4me3 peaks gained upon loss of *Ezh2* correlated with the presence of  
214 H3K27me3 in wildtype embryos. In wildtype embryos, 6.1% of H3K4me3 peaks were also covered by  
215 H3K27me3, which is more than expected by random chance (*P*-value < 0.001). In *MZezh2* mutant  
216 embryos, a significant increase to 8.3% of the H3K4me3 peaks was found on regions positive for  
217 H3K27me3 in wildtypes embryos (*P*-value < 0.001). This enrichment was even higher when taking  
218 into account only the *MZezh2* mutant specific H3K4me3 peaks (25.1% with *P*-value < 0.001) (Figure  
219 2D,E). This result shows that the regions positive for H3K27me3 in wildtype are more susceptible to  
220 gain H3K4me3 upon loss of H3K27me3.

221 Next, we determined if the epigenetic landscape at the transcription start sites (TSS) in wildtype  
222 embryos had an influence on the ability to gain of H3K4me3 upon loss of Ezh2. We classified all the  
223 TSS from the zebrafish in four categories according to our ChIP-seq data in wildtype embryos: active  
224 TSS positive for H3K4me3, repressed TSS positive for H3K27me3, TSS positive for both marks, and  
225 TSS negative for both marks. Comparison of the level of H3K4me3 binding in *MZezh2* mutant and  
226 wildtype embryos on these TSS revealed that 3.9% ( $P$ -value < 0.001) of the H3K27me3 positive and  
227 4.4% ( $P$ -value < 0.001) of the H3K4me3/H3K27me3 double positive TSS were enriched (Fold Change:  
228  $FC \geq 2$ ) for H3K4me3 in *MZezh2* mutant embryos compared with random TSS (0.9%). TSS positive for  
229 only H3K4me3 or negative for both H3K27me3 and H3K4me3 were less likely to show an increase in  
230 H3K4me3 binding in *MZezh2* mutant embryos compared with random TSS (0.6%,  $P$ -value < 0.01 and  
231 0.4%,  $P$ -value < 0.001 respectively) (Figure 2F,G).

232 To find all the potential direct targets of PcG-mediated repression gaining H3K4me3 in absence of  
233 Ezh2, we searched for the closest genes of the H3K4me3 mutant-specific peaks, which had an  
234 H3K27me3 peak in wildtype embryos, and identified 463 genes. Gene ontology analysis revealed  
235 that these genes were mainly involved in transcriptional regulation and organismal development  
236 (Figure 2H). Among these 463 identified genes, 143 encode for transcription factors, among which  
237 were members of the *hox*, *tbx*, *sox*, and *pax* gene families, known targets of PcG complexes.

238 During development, gene transcription is also controlled by enhancer activation(33). H3K27me3  
239 and H3K27ac are known to have an opposite effect on enhancer activation, the former being  
240 associated to poised enhancers and the latter to active enhancers(34). We studied the binding of  
241 H3K27ac in 24 hpf embryos lacking H3K27me3. Unlike H3K4me3, the number of peaks enriched for  
242 H3K27ac decreased by more than a half in *MZezh2* mutants compared with wildtype (4,155 and  
243 8,952 peaks detected, respectively) (Supplementary Figure 2A, Supplementary Table 1). This loss of  
244 H3K27ac was associated with a decrease in coverage intensity (Supplementary Figure 2B).

245 These results suggest that loss of PcG-mediated repression has a specific effect rather than a general  
246 impact on deposition of activating epigenetic marks.

247

#### 248 **Epigenetic changes in *MZezh2* mutant embryos induce upregulation of transcription factors**

249 As *MZezh2* mutant embryos show a complete lack of the H3K27me3 repressive mark and a selective  
250 increase in H3K4me3 activating mark on genes coding for transcription factors, we investigated the  
251 effect of loss of Ezh2 on the transcriptome by RNA-sequencing (RNA-seq) of wildtypes and *MZezh2*  
252 mutants at 24 hpf. Differential gene expression analysis between the two conditions revealed a  
253 limited effect on the transcriptome upon the loss of Ezh2. Only 60 genes were detected to be  
254 significantly upregulated ( $\log_2FC \geq 1$  and  $P\text{-adj} < 0.05$ ) and 28 genes downregulated ( $\log_2FC \leq -1$  and  
255  $P\text{-adj} < 0.05$ ) in *MZezh2* mutants (Figure 3A). When inspecting the upregulated genes, we found 60%  
256 of the upregulated genes (compared to 9.3% in all genes,  $P\text{-value} < 0.001$ ) to be targeted by  
257 H3K27me3 in wildtype embryos (Figure 3B,C). On the other hand, the upregulated genes were less  
258 likely to be targeted by H3K4me3 in wildtype embryos compared to all zebrafish genes (21.7%  
259 compared to 47.8%,  $P\text{-value} < 0.001$ ), yet gained significant binding of H3K4me3 in *MZezh2* mutant  
260 embryos (23.3% compared to 5.3%,  $P\text{-value} < 0.001$ , Figure 3B,C). No gain of H3K4me3 was detected  
261 on genes downregulated in *MZezh2* mutants (Figure 3B,C).

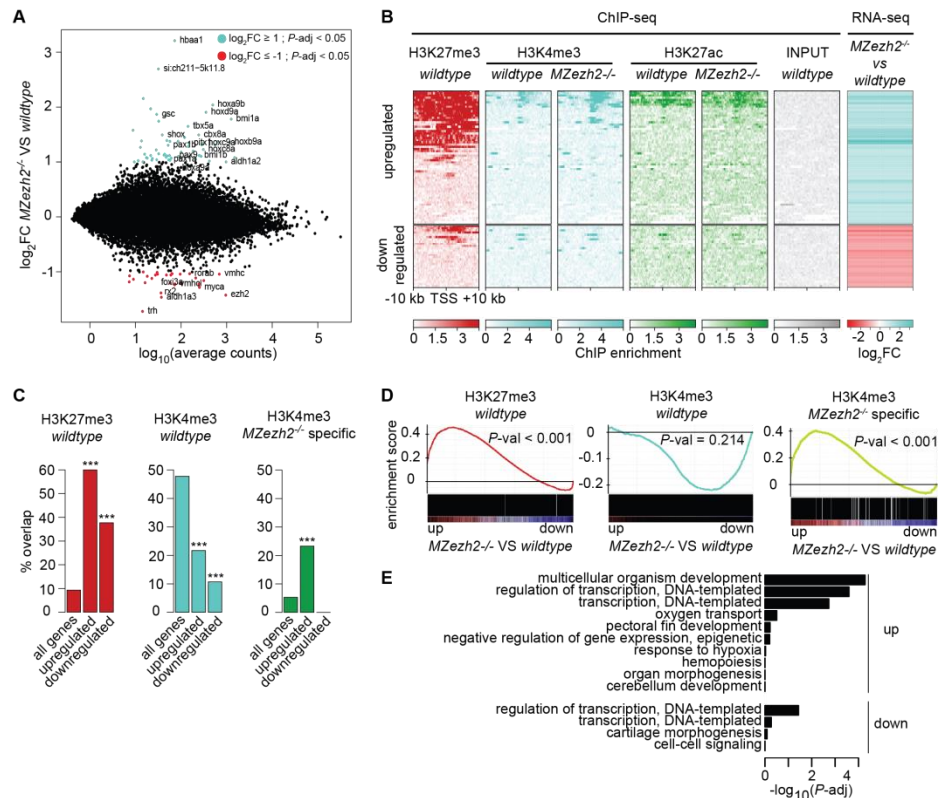

262

Rougeot\_Fig. 3

263 **Figure 3. Loss of maternal zygotic *ezh2* results in overexpression of specific developmental genes.**

264 **(A)** MA-plot showing the fold change ( $\log_2$ -transformed) between gene expression in 24 hpf *MZezh2*  
 265 mutant (*MZezh2*<sup>-/-</sup>) and wildtype embryos as a function of the normalized average count between  
 266 the two conditions ( $\log_{10}$ -transformed) as calculated with DESeq2. Turquoise:  $\log_2FC \geq 1$  and  $P$ -adj <  
 267 0.05, red:  $\log_2FC \leq -1$  and  $P$ -adj < 0.05. **(B)** Heatmaps of RPKM-normalized coverage after ChIP-seq  
 268 for H3K27me3 in wildtype embryos and H3K4me3 and H3K27ac in wildtype and *MZezh2*<sup>-/-</sup> embryos  
 269 at 24 hpf. Heatmaps display 20 kb regions around TSS from genes detected upregulated or  
 270 downregulated in *MZezh2*<sup>-/-</sup> embryos compared to wildtype embryos at 24 hpf. The input track  
 271 obtained from 24 hpf wildtype embryos was used as control. Most right column represents  
 272 differential gene expression analysis in *MZezh2*<sup>-/-</sup> compared to wildtype embryos at 24 hpf. Colors  
 273 represent ChIP-seq for different proteins with red: H3K27me3, turquoise: H3K4me3, green:  
 274 H3K27ac, and grey: Input control. For RNA-seq, turquoise represent overexpressed genes and red  
 275 downregulated genes. **(C)** Percentage of TSS (+/- 2kb window) showing an overlap with H3K27me3

276 (red, left) or H3K4me3 (turquoise, center) in wildtype embryos and with *MZezh2*<sup>-/-</sup> specific H3K4me3  
277 (green, right) at 24 hpf. Selected TSS sets are all TSS from annotation, TSS from genes upregulated in  
278 *MZezh2*<sup>-/-</sup> embryos, and TSS from genes downregulated in *MZezh2*<sup>-/-</sup> embryos at 24 hpf.  $\chi^2$ : \*\*\* *P*-  
279 value < 0.001. (D) Gene Set Enrichment Analysis (GSEA) plots of gene expression changes in *MZezh2*<sup>-/-</sup>  
280 embryos compared to wildtype embryos at 24 hpf. Gene sets used for the analyses are H3K27me3  
281 positive genes in wildtype embryos (red, left), H3K4me3 positive genes in wildtype embryos  
282 (turquoise, center), and H3K4me3 positive genes in *MZezh2*<sup>-/-</sup> embryos specifically (green, right) at  
283 24 hpf. (E) Gene Ontology of biological processes analysis of genes upregulated or downregulated in  
284 *MZezh2*<sup>-/-</sup> embryos compared to wildtype embryos at 24 hpf.

285

286 As a complement, we studied the relation between changes in transcriptome and epigenome by  
287 performing Gene Set Enrichment Analysis (GSEA)(35, 36). This analysis revealed that the genes  
288 upregulated in *MZezh2* mutants showed enrichment for the set of genes occupied by H3K27me3 in  
289 wildtype embryos (n=2336, Fig 3d, left panel). The set of genes positive for H3K4me3 in wildtype  
290 embryos (n=11979) showed no enrichment for neither upregulated nor downregulated genes in  
291 *MZezh2* mutants (Figure 3D, middle panel). The genes with higher expression in *MZezh2* mutants  
292 showed a clear association with the presence of *MZezh2* mutant specific H3K4me3 peaks (n=1317,  
293 Figure 3D, right panel). Thus, through the GSEA, we can confirm the association between the loss of  
294 H3K27me3 repressive chromatin and the gain of new H3K4me3 positive chromatin on specific loci  
295 with the gain in gene expression in *MZezh2* mutant embryos at 24 hpf.

296 GO analysis of the deregulated genes in *MZezh2* mutants revealed enrichment in biological  
297 processes of regulation of transcription and development (Figure 3E), a majority of these genes  
298 encoding for transcription factors. Anatomical terms associated with the deregulated genes  
299 indicated that these genes were expressed in organs showing strong phenotypes in *MZezh2* mutant  
300 embryos, such as fin bud, retina, and heart tube (Supplementary Figure 3A).



301

302 **Deregulations in epigenome and transcriptome are linked to changes in protein expression in**  
303 ***MZezh2* mutant embryos**

304 We next performed proteomic analysis of the *MZezh2* mutant embryos and compared the result  
305 with wildtype embryos at 24 hpf. Differential analysis revealed 111 upregulated ( $\log_2FC \geq 1.5$  and  $P$ -  
306  $adj < 0.05$ ) and 110 downregulated ( $\log_2FC \leq -1.5$  and  $P$ - $adj < 0.05$ ) proteins (Figure 4A,  
307 Supplementary Table 1). After ranking the proteins based on their difference in expression between  
308 the two conditions, we explored those differences in the context of different epigenetic marks and  
309 changes in the transcriptome by GSEA. Results showed that upregulated proteins were enriched in  
310 H3K27me3 targets in wildtypes and presented mutant-specific H3K4me3 peaks in *MZezh2* mutant  
311 embryos (Figure 4B). Upregulation and downregulation of protein expression also correlated with  
312 deregulation of gene expression in transcriptome (Figure 4C). For example, *hoxa9b* was one of the  
313 top overexpressed targets in both the transcriptome and proteome analyses (Figure 3A, Figure 4A,  
314 Supplementary Table 1).



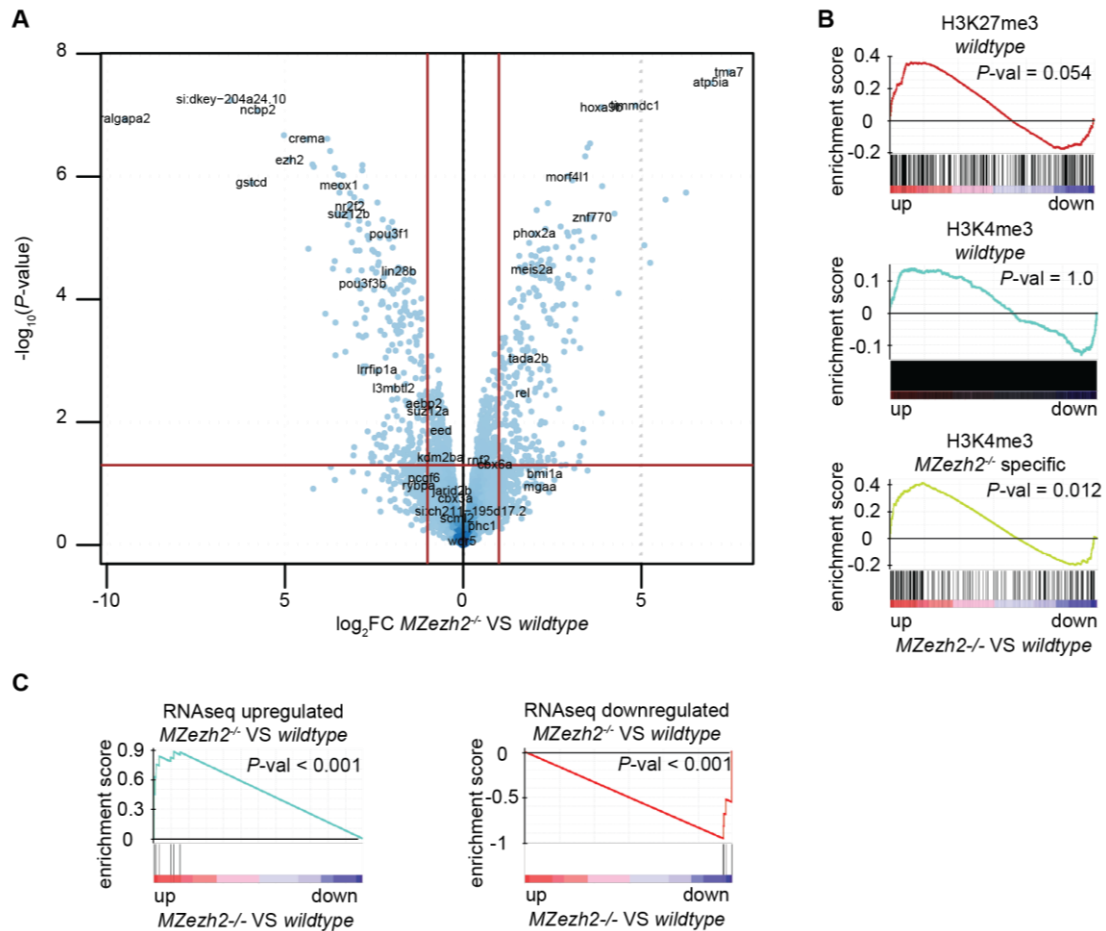

315

Rougeot\_Fig4

316 **Figure 4. Chromatin and transcriptome changes are translated at the protein level. (A)** Volcano plot  
 317 showing the  $P$ -value ( $-\log_{10}$ -transformed) as a function of the fold-change ( $\log_2$ -transformed)  
 318 between protein expression level in  $MZezh2$  mutant ( $MZezh2^{-/-}$ ) compared to wildtype embryos at  
 319 24 hpf. **(B)** GSEA plots of protein expression changes in  $MZezh2^{-/-}$  embryos compared to wildtype  
 320 embryos at 24 hpf. Gene sets used for the analyses are H3K27me3 positive genes in wildtype  
 321 embryos (red, top), H3K4me3 positive genes in wildtype embryos (turquoise, middle), and  $MZezh2^{-/-}$   
 322 specific H3K4me3 positive genes (green, bottom) at 24 hpf. **(C)** GSEA plots of protein expression  
 323 changes in  $MZezh2^{-/-}$  embryos compared to wildtype embryos at 24 hpf. Gene sets used for the  
 324 analyses are genes found upregulated (turquoise, left) and genes found downregulated (red, right) in  
 325  $MZezh2^{-/-}$  compared to wildtype embryos at 24 hpf in our RNA-seq experiments.

326

327 Furthermore, in addition to Ezh2, Suz12b was found to be downregulated in *MZezh2* mutant  
328 embryos (Figure 4A). Other PRC2 subunits were either not detected or (not significantly)  
329 downregulated. Subunits of the canonical PRC1 complex were mostly overexpressed, although not  
330 significant (Supplementary Figure 3B).

331 The low number of deregulated genes detected by both transcriptomic and proteomic analyses  
332 suggests that changes in expression could be either global and low in intensity or limited to specific  
333 cell types or tissues. To test these hypotheses, we carried out a spatial expression analysis on  
334 selected target genes.

335

### 336 **Loss of *ezh2* results in expression of *hox* genes outside their normal expression domains**

337 To start with, we focused on expression of different genes from the *hox* gene family. These genes  
338 are known targets of Polycomb-mediated repression(37) and some of them have been previously  
339 shown to be deregulated in *MZezh2* mutant embryos(28). Every *hox* gene has an expression pattern  
340 that is restricted along the anterior-posterior axis(38). To obtain spatially resolved data along the  
341 anterior-posterior axis, we performed RT-qPCR on the anterior half and the posterior half of 24 hpf  
342 wildtype and *MZezh2* mutant embryos. We then compared the normalized relative expression levels  
343 between the different halves of the *MZezh2* mutant and wildtype embryos. The tested *hox* genes  
344 were selected based on their domain of expression along the anterior-posterior axis (Figure 5A-D).  
345 The *hoxa9a* gene, whose expression extends to anterior, until slightly outside the posterior half of  
346 the embryos, showed, as expected, a higher expression in the posterior part than in the anterior part  
347 in wildtype embryos (Figure 5A). In *MZezh2* mutants, *hoxa9a* was overexpressed in the anterior  
348 compartment compared with wildtype embryos, reaching levels similar to those observed in the  
349 posterior part of wildtype embryos. No significant differences were detected in the level of

350 expression when comparing the posterior compartment of *MZezh2* mutant and wildtype embryos  
351 (Figure 5A). Similar results were obtained for *hoxa9b*, where overexpression was detected in the  
352 anterior compartment of *MZezh2* mutant embryos compared to the anterior compartment of  
353 wildtype embryos (Figure 5B). The *hoxa11b* and *hoxa13b* genes, which are expressed primarily  
354 posterior, showed, as expected, higher expression in the posterior half of the wildtype embryos  
355 compared to the anterior half (Figure 5C,D). In the *MZezh2* mutant embryos, both *hox* genes were  
356 upregulated in the anterior half of the *MZezh2* mutant embryos compared to wildtypes (Figure 5C,D)  
357 but their expression level remained lower than in the posterior half of the wildtype embryos (Figure  
358 5C,D).

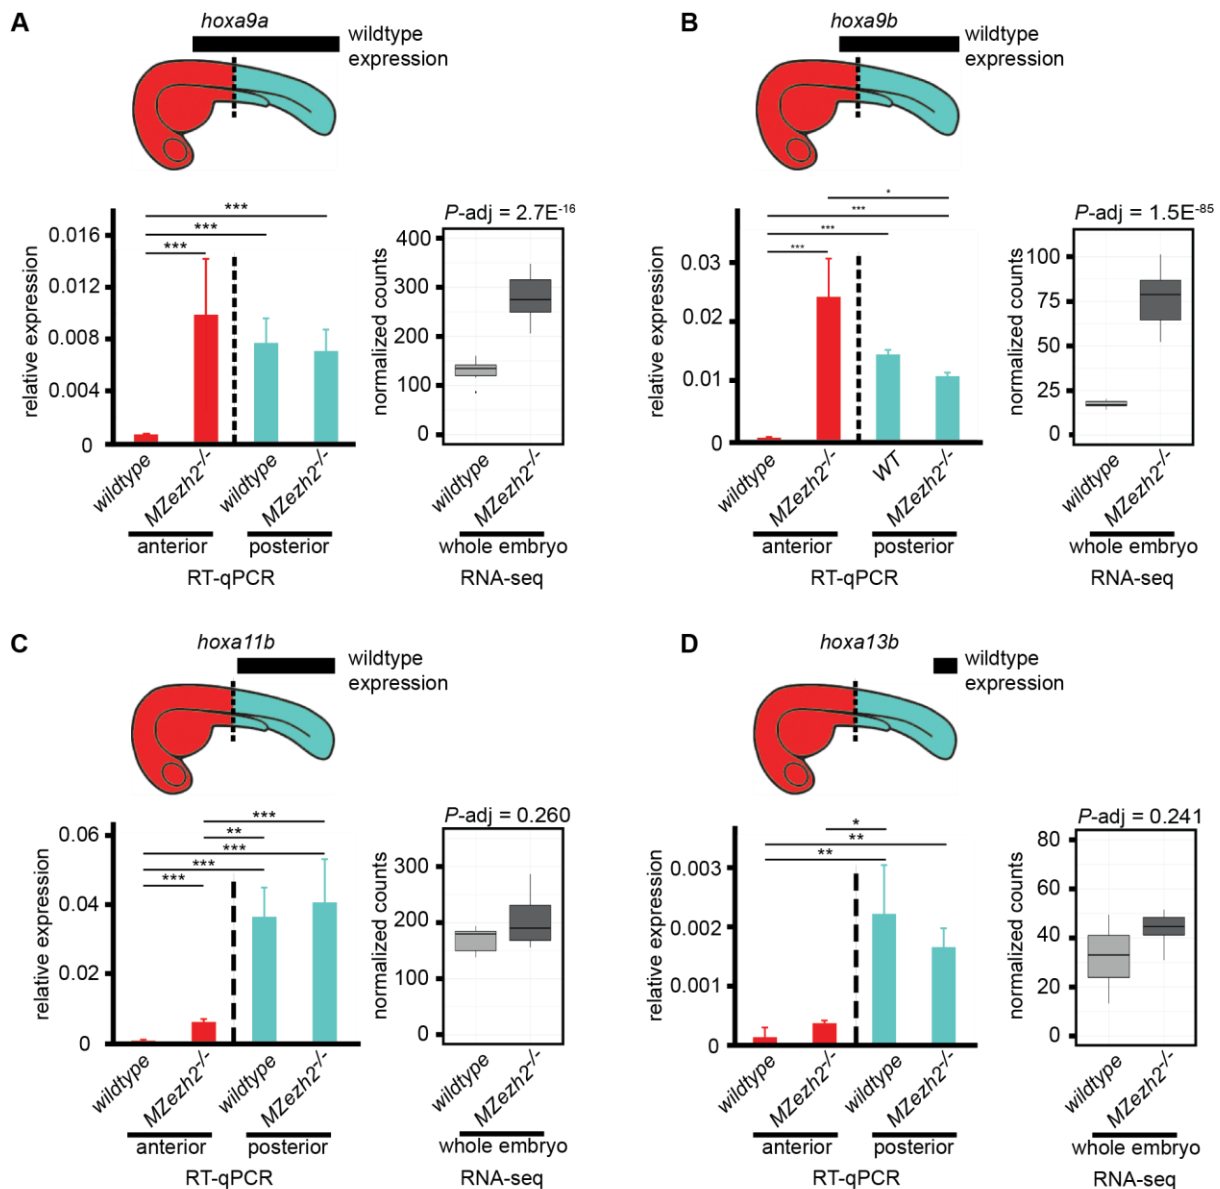

359

Rougeot\_Fig. 5

360 **Figure 5. Loss of maternal and zygotic *ezh2* results in ectopic expression of *hox* genes. (a, b, c, d)**  
 361 Expression analysis of (A) *hoxa9a*, (B) *hoxa9b*, (C) *hoxa11b*, and (D) *hoxa13b* at 24 hpf. Bar plots on  
 362 the left side of each panel represent relative expression of indicated *hox* genes in the anterior half  
 363 (red) and posterior half (turquoise) of wildtype and *MZezh2* mutant (*MZezh2*<sup>-/-</sup>) embryos. Boxplots  
 364 on the right side of each panel represent normalized counts from RNA-seq experiments in *MZezh2*<sup>-/-</sup>  
 365 and wildtype whole embryo lysates at 24 hpf. Above is a schematic representation of 1 dpf embryos.  
 366 Black boxes represent the expression domains of the *hox* genes in wildtype embryos based on

367 published data(39). Dashed lines represent the demarcation between anterior (red) and posterior  
368 (turquoise) parts of the embryo used for RT-qPCR analysis. For RT-qPCR, relative expression was  
369 calculated based on expression of housekeeping gene *actb1*. Error bars represent standard  
370 deviations. Relative expression was compared between anterior or posterior parts in *MZezh2<sup>-/-</sup>* and  
371 wildtype embryos (one-way ANOVA with post-tests, \*\*\* *P*-value < 0.001, \*\* *P*-value < 0.01, \* *P*-value  
372 < 0.05). For RNA-seq, adjusted *P*-values were extracted from Differential Expression analysis with  
373 DEseq2.

374

375 These comparative analyses of anterior and posterior parts of the embryo suggest that, upon loss of  
376 *Ezh2*, *hox* genes show an ectopic anterior expression while keeping wildtype expression levels in  
377 their normal expression domains.

378

### 379 **Different transcription factors show various profiles of deregulation in the absence of *Ezh2***

380 To further pursue our investigation on the changes in gene expression patterns in absence of *Ezh2*,  
381 we performed *in situ* hybridization (ISH) on members from the *tbx* gene family of transcription  
382 factors. The *tbx2a*, *tbx2b*, *tbx3a*, and *tbx5a* genes have partial overlapping expression patterns in  
383 wildtype embryos, but also display gene specific expression domains (Figure 6A). At 24 hpf, these *tbx*  
384 gene family members are expressed in the dorsal region of the retina, in the heart, and the pectoral  
385 fins(40, 41). In addition, the genes *tbx2a*, *tbx2b*, and *tbx3a* are expressed in the otic vesicle. The  
386 genes *tbx2b* and *tbx3a* are expressed in different ganglions and neurons in anterior and posterior  
387 regions of wildtype embryos(40). Finally, expression of *tbx2b* can also be detected in part of  
388 pharyngeal arches 3-7 and the distal region of the pronephros and *tbx3a* expression can be detected  
389 in the brachial arches(39). This spatial prevalence of *tbx* gene expression in the anterior half of the

390 embryo was also detected by RT-qPCR at 24 hpf, where *tbx2a*, *tbx2b* and *tbx5a* expression was  
 391 significantly higher in the anterior than in the posterior part of wildtype embryos (Figure 6B).

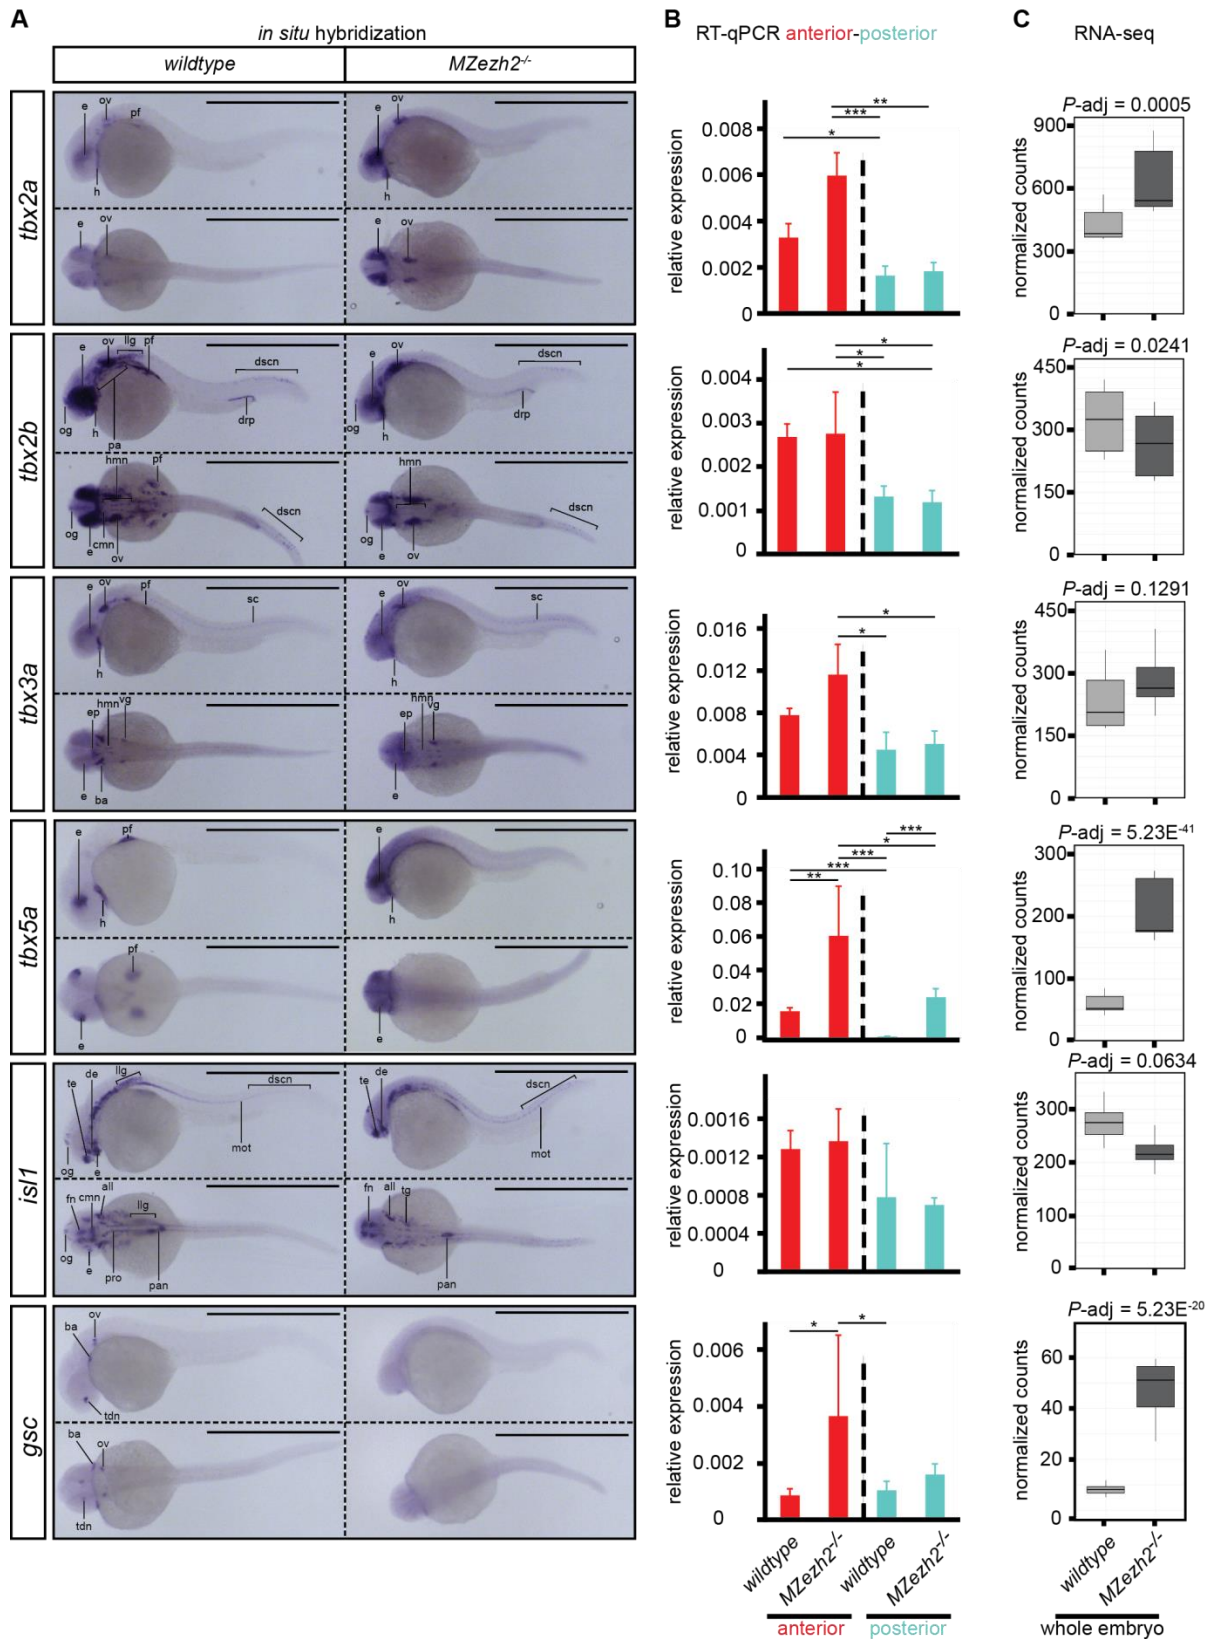

392

Rougeot\_Fig. 6

393 **Figure 6. Transcription factor expression is spatially deregulated in *MZezh2* mutant (*MZezh2*<sup>-/-</sup>)**  
394 **embryos. (A, B, C)** Spatial expression analysis by (A) *in situ* hybridization (ISH), (B) RT-qPCR on  
395 anterior half and posterior half, and (C) RNA-seq results of transcription factors *tbx2a*, *tbx2b*, *tbx3a*,  
396 *tbx5a*, *isl1*, and *gsc* in 24 hpf embryos. In ISH, scale bars represent 1 mm. For RT-qPCR, relative  
397 expression was calculated based on expression of housekeeping gene *actb1*. Error bars represent  
398 standard deviations. Relative expression was compared between anterior (red) or posterior  
399 (turquoise) parts in *MZezh2*<sup>-/-</sup> and wildtype embryos (one-way ANOVA with post-tests, \*\*\* *P*-value <  
400 0.001, \*\* *P*-value < 0.01, \* *P*-value < 0.05). Right boxplots represent normalized counts from RNA-  
401 seq experiments in whole *MZezh2*<sup>-/-</sup> and wildtype embryos and adjusted *P*-values were taken from  
402 Differential Expression analysis with DEseq2. all: anterior lateral lane ganglion, ba: branchial arch,  
403 cmn: cranial motor neurons, de: diencephalon, drp: distal region of the pronephros, dscn: dorsal  
404 spinal cord neurons, e: eye, ep: epiphysis, fn: forebrain nuclei, h: heart, hmn: hindbrain motor  
405 neurons, llg: lateral lane ganglion, mot: primary motor neurons, og: olfactory ganglion, ov: otic  
406 vesicle, pa: pharyngeal arches, pan: pancreas, pf: pectoral fin, pro: pronephros, sc: spinal cord, tdn:  
407 telencephalon and diencephalon nuclei, te: telencephalon, vg: ventral ganglion.

408

409 ISH for these *tbx* genes on *MZezh2* mutant embryos at 24 hpf suggests ectopic expression of these  
410 transcription factors around their normal expression pattern in the eye, the otic vesicle, and the  
411 heart, except for *tbx2b* (Figure 6A). This scattering in gene expression was reflected in a trend  
412 towards a higher expression in the anterior half of *MZezh2* mutant embryos as detected by RT-qPCR,  
413 although only *tbx2a* and *tbx5a* results were significant (Figure 6B). In addition, ISH for *tbx5a*, and to  
414 a lesser extent *tbx3a*, showed ubiquitous expression throughout the entire body of *MZezh2* mutants  
415 which was not visible in wildtypes (Figure 6A). RT-qPCR results confirmed increased expression of  
416 *tbx5a* in both the anterior and posterior half of the *MZezh2* mutant embryos (Figure 6B).



417 Beside the observed ectopic expression, all tested *tbx* genes showed absence of expression in  
418 specific structures upon *Ezh2* loss. For example, in *MZezh2* mutant embryos, all four *tbx* genes  
419 showed no expression in the fin bud (Figure 6A). In *MZezh2* mutant embryos, the gene *tbx2b*  
420 showed no expression in the pharyngeal arches 3-7 and the lateral line ganglions, and *tbx3a* was not  
421 observed in the branchial arches (Fig 6a). This absence of expression was not detected by RT-qPCR  
422 (Figure 6B) but a trend toward downregulation for *tbx2b* was observed in RNA-seq results on whole  
423 *MZezh2* mutant embryo lysates (Figure 6C).

424 In addition, we tested transcription factors from other families which were targeted by H3K27me3 in  
425 wildtype. The transcription factor *isl1*, expressed in all primary neurons(42), showed a similar  
426 absence of expression in the fin bud and the cranial motor neurons in the midbrain (trigeminal, facial  
427 and vagal motor neurons), as observed for *tbx2a*. Its expression was also absent in the ventral region  
428 of the eye, the facial ganglia, and in the pronephros from *MZezh2* mutant embryos, where it is  
429 normally expressed in wildtype embryos(43, 44) (Figure 6A). This loss in expression in *MZezh2*  
430 mutant embryos was not detected by RT-qPCR but a clear tendency toward downregulation was  
431 detected by RNA-seq (Figure 6B,C). Even more surprising was the expression pattern of *gsc* in the  
432 *MZezh2* mutant embryos. Whereas all the wildtype embryos show highly specific expression in the  
433 telencephalon and diencephalon nuclei, the branchial arches, and the otic vesicle(39), *gsc* expression  
434 was lost and replaced by a weak but ubiquitous expression in *MZezh2* mutant embryos (Figure 6A).  
435 This observation was confirmed by RT-qPCR and RNA-seq where upregulation of *gsc* was clearly  
436 detected in *MZezh2* mutant embryos (Figure 6B,C).

437 Taken together, these spatial expression analyses showed that the tested transcription factors are  
438 expressed outside their normal wildtype expression boundaries in *MZezh2* mutant embryos at 24  
439 hpf. Furthermore, expression of some of these genes is lost in specific tissues in the *MZezh2* mutant  
440 embryos.

441



442

443

444 **Discussion**

445 Here, we showed for the first time the genome-wide binding patterns of Ezh2 and Rnf2, the catalytic  
446 subunits of PRC2 and PRC1, respectively, in 24 hpf zebrafish embryos. The overall overlap between  
447 the binding patterns of Ezh2, Rnf2, and the PcG related epigenetic mark H3K27me3 suggests that the  
448 PcG-mediated gene repression mechanisms(6) are evolutionary conserved in zebrafish development.  
449 The complete loss of H3K27me3 in *MZezh2* mutant embryos reveals that Ezh2 is the only  
450 methyltransferase involved in trimethylation of H3K27 during early zebrafish development. This  
451 result was expected as Ezh1, the only other H3K27me3 methyltransferase, is not maternally loaded  
452 nor expressed in the zebrafish embryo until at least after 1 dpf(28, 45-47). In addition, proteomics  
453 results showed decreased protein expression of most PRC2 subunits. This could indicate a  
454 destabilization of PRC2 in absence of the catalytic subunit in *MZezh2* mutant embryos. We could  
455 therefore confirm that zebrafish embryos can form a normal body plan in absence of PRC2-mediated  
456 gene repression.

457 The total loss of Rnf2 binding in the *MZezh2* mutants suggests that only the canonical pathway, in  
458 which PRC2 is required for PRC1 recruitment, is active during this stage of development. This  
459 absence of PRC1 recruitment to the chromatin is not caused by an absence of the complex in the  
460 *MZezh2* mutants, since most of the PRC1 subunits were detectable and even upregulated as shown  
461 by proteomic analysis. This is in contrast with studies in cultured mouse embryonic stem cells where  
462 non-canonical PRC1 complexes were shown to be recruited to developmental regulated genes  
463 independently of PRC2(12, 14). This difference could be explained by the complete absence of  
464 H3K27me3 since fertilization in *MZezh2* mutant embryos, whereas other studies used conditional  
465 knockdown. Therefore, our model suggests that the PRC2-independent recruitment of PRC1 during

466 early development can occur if PRC1 recruitment was first primed by a PRC2-dependent mechanism  
467 happening earlier during development.

468 As repressive and activating marks are known to antagonize each other(16), one could expect an  
469 increase in the H3K4me3 level deposited by TrxG proteins in absence of H3K27me3 associated with  
470 an increase in gene activation. However, the effects on H3K4me3 deposition, gene expression, and  
471 protein expression are limited in *MZezh2* mutant embryos at 24 hpf. This observation is in  
472 agreement with the near complete absence of phenotype at this developmental time point. Thus, it  
473 appears that transcriptional regulation during zebrafish development is largely PRC2-independent  
474 until later stages of development, when maintenance of cellular identity is required. These results  
475 were unexpected, as PRC2 is described to be essential during mammalian development already  
476 during gastrulation(19-21). Exploring distribution of other repressive epigenetic marks in *MZezh2*  
477 mutant embryos could reveal compensation mechanisms safeguarding gene repression during early  
478 development, as it was previously shown that absence of both DNA methylation and H3K9me3 could  
479 influence H3K27me3, and reciprocally(48-50). Possibly, the external development of the zebrafish  
480 could also explain this difference in phenotype.

481 Although limited, genes that show a gain in H3K4me3 deposition or in expression upon loss of *ehz2*  
482 are mainly transcription factors targeted by H3K27me3 in wildtype embryos. That only a minor  
483 fraction of all H3K27me3 target genes gained expression (4.1%) suggests different mechanisms of  
484 regulation of PcG target genes. Our hypothesis is that control of gene expression by signaling  
485 pathways and transcription factor networks(51) is a robust mechanism and can be maintained until 1  
486 dpf in absence of repression by PcG complexes. At 1 dpf, in absence of PcG-mediated repression, the  
487 first derepressed genes will be the genes subjected to the most fine-tuned transcriptional control,  
488 such as genes controlled by precise morphogen gradients. For example, it was shown that PRC2  
489 attenuates expression of genes controlled by retinoic acid signaling(52, 53). In vertebrates, and most  
490 particularly zebrafish, retinoic acid signaling is responsible for induction of formation of, among

491 others, the forelimb field(54, 55), dorsoventral patterning of eyes(56, 57), hindbrain patterning(58),  
492 *hox* gene expression(59), and the development of other organs(60). All these processes are affected  
493 in *MZezh2* mutant embryos at 24 hpf and onwards and, therefore, could be explained by a defect in  
494 the response to retinoic acid signaling.

495 Spatial analysis of gene expression revealed different effects on gene expression patterns caused by  
496 loss of *Ezh2*, which could not be detected by RNA-seq on whole embryo lysates. Anterior-posterior  
497 specific RT-qPCR showed that *hox* genes become abnormally expressed in the anterior half of the  
498 *MZezh2* mutant embryos; whereas expression levels in the posterior half remained unchanged.  
499 These results are in agreement with previous studies showing ectopic expression of *hox* genes in  
500 PRC1 and PRC2 zebrafish mutants(28, 61). Other transcription factors, such as the *tbx* gene family  
501 members, showed more diverse patterns of deregulation compared to *hox* genes. ISH and RT-qPCR  
502 showed that, among the *tbx* genes examined, some were overexpressed outside their normal  
503 expression domains (*tbx2a*, *tbx3a*, and *tbx5a*), whereas others were also ubiquitously upregulated  
504 (*tbx3a* and *tbx5a*). The case of eye patterning is a good example of the defect in control of gene  
505 expression pattern in *MZezh2* mutant embryos. In wildtype embryos, at 24 hpf, *tbx* genes are  
506 expressed in the dorsal part of the eye whereas *isl1* is expressed in the ventral part. Upon loss of  
507 *Ezh2*, our ISH results showed that the expression of the *tbx* genes expands to the whole eye whereas  
508 *isl1* disappears from the ventral region. We concluded that Polycomb-mediated repression is  
509 therefore responsible for maintenance of expression domains rather than control of expression  
510 level.

511 Expression analysis by ISH for *tbx* and *hox* genes as well as for *isl1* also showed loss of expression in  
512 specific structures in *MZezh2* mutant embryos. We reasoned that the absence of expression of *hox*  
513 and *tbx* genes in the fin bud could be a secondary effect due to the absence of this structure in  
514 *MZezh2* mutants(28). The same phenomenon could explain the lack of detection of *tbx2b* and *isl1* in  
515 pharyngeal arches, pronephros, and lateral line ganglions. The case of *gsc* expression is more

516 striking, as its normal expression pattern is totally abolished and replaced by a ubiquitous expression  
517 pattern. The *gsc* gene is known to be expressed in the Spemann organizer during gastrulation and  
518 therefore all cells will transiently express *gsc* when undergoing gastrulation(62, 63). In absence of  
519 *Ezh2*, *gsc* expression could remain active in all cells after leaving the Spemann organizer, leading to a  
520 ubiquitous expression pattern and impaired tissue specific expression in 24 hpf *MZezh2* mutant  
521 embryos.

522 To conclude, our results show that early embryonic development, including germ layer formation  
523 and cell fate specification, is independent of PcG-mediated gene repression until axis are formed and  
524 organs specified. PcG-mediated gene repression is then required to control precise spatial restricted  
525 expression of specific transcription factors. We hypothesize that subtle changes in expression of  
526 these master gene regulators subsequently will lead to progressive and accumulating changes in  
527 gene network regulation and result in loss of tissue identity maintenance. Our results constitute a  
528 major advance in the understanding of the mechanisms of PcG-mediated epigenetic gene regulation  
529 during vertebrate development.

530

531

## 532 **Materials and methods**

### 533 **Zebrafish genetics and strains**

534 Zebrafish (*Danio rerio*), were housed according to standard conditions(64) and staged according to  
535 Kimmel et al.(65). The *ezh2* nonsense mutant (*hu5670*)(28), *Tg(H2A::GFP)*(66), and *Tg(vas::eGFP)*(67)  
536 zebrafish lines have been described before. Genotyping of the *ezh2* allele was performed as  
537 previously described(28) with following adaptations: different primer pairs were used for PCR and  
538 nested PCR (Supplementary Table S2), of which the restriction profile is shown on Supplementary

539 Figure 1F. All experiments were carried out in accordance with animal welfare laws, guidelines, and  
540 policies and were approved by the Radboud University Animal Experiments Committee.

541

#### 542 **Germ cell transplantation**

543 Germ cell transplantation was performed as described previously(28). For all experiments below,  
544 *ezh2* germline mutant females were crossed with *ezh2* germline mutant males to obtain 100%  
545 *MZezh2* mutant progeny. The germline wild-type sibling males and females obtained during  
546 transplantation were used to obtain 100% wildtype progeny with similar genetic background and are  
547 referred to as wildtype. The embryos used were all from the first generation after germline  
548 transplantation.

549

#### 550 **Western blotting**

551 At 3.3 hpf, 50 embryos were collected, resuspended in in 500  $\mu$ l  $\frac{1}{2}$  Ringer solution (55 mM NaCl, 1.8  
552 mM KCl, 1.25 mM NaHCO<sub>3</sub>) and forced through a 21G needle and a cell strainer in order to remove  
553 the chorion and disrupt the yolk. At 24 hpf, 20 embryos were collected and resuspended by  
554 thorough pipetting in 500 $\mu$ l  $\frac{1}{2}$  Ringer solution in order to disrupt the yolk. The samples of 3.3 and 24  
555 hpf were centrifuged for 5 minutes at 3,500 g at 4°C and washed two additional times with 500  $\mu$ l  $\frac{1}{2}$   
556 Ringer solution. The embryo pellet was frozen in liquid nitrogen and stored at -80°C. Whole protein  
557 extraction was performed by adding 40  $\mu$ l of RIPA buffer (100 mM Tris-HCl pH 8, 300 mM NaCl, 2%  
558 NP-40, 1% Sodium Deoxycholate, 0.2% SDS, 20% glycerol, 1x cOmplete EDTA-free protease inhibitor  
559 cocktails from Sigma) and sonication for 2 cycles of 15s ON and 15s OFF on medium power at 4°C on  
560 a PicoBioruptor (Diagenode). After 10 minutes incubation at 4°C, embryo lysates were centrifuged  
561 for 12 minutes at 16,000 g at 4°C and supernatant was transferred in a new tube. 20  $\mu$ g protein was  
562 mixed with SDS containing sample loading buffer, denaturated at 95°C for 5 minutes and analyzed by  
563 Western blot analysis. Antibodies used for immunoblotting are described in Supplementary Table S3  
564 HRP-conjugated anti-rabbit secondary antibody was used (Supplementary Table S3) and protein

565 detection was performed with ECL Select Western Blotting Detection Reagent (GE Healthcare,  
566 RPN2235) on an ImageQuant LAS 4000 (GE Healthcare).

567

### 568 **ChIP-sequencing**

569 For chromatin preparation, embryos from a germline mutant or germline wildtype incross were  
570 collected at 24 hpf and processed per batches of 300 embryos. Embryos were first dechorionated by  
571 pronase (0.6 µg/µl) treatment and then extensively washed with E3 medium. Subsequently, embryos  
572 were fixed in 1% PFA (EMS, 15710) for 15 minutes at room temperature and fixation was terminated  
573 by adding 0.125M glycine and washed 3 times in cold PBS. Yolk from fixed embryos was disrupted by  
574 pipetting the fixed embryos 10 times with a 1 ml tip in 600 µl of ½ Ringer solution (55 mM NaCl, 1.8  
575 mM KCl, 1.25 mM NaHCO<sub>3</sub>) and incubated for 5 minutes at 4°C on a rotating wheel. Embryos were  
576 pelleted by centrifuging 30 seconds at 300 g and the supernatant was removed. De-yolked embryos  
577 were resuspended in 600 µl sonication buffer (20 mM Tris-HCl pH 7.5, 70 mM KCl, 1 mM EDTA, 10%  
578 glycerol, 0.125% NP40, 1x cComplete EDTA-free protease inhibitor cocktails from Sigma) and  
579 homogenized with a Dounce homogenizer (6 strokes with pestle A, followed by 6 strokes with pestle  
580 B). Homogenates were sonicated for 6 cycles of 30 seconds ON/30 seconds OFF on a PicoBioruptor  
581 (Diagenode), centrifuged for 10 minutes at 16,000 g at 4°C, and the supernatant containing the  
582 chromatin was stored at -80°C. 20 µl of the supernatant was subjected to phenol-chloroform  
583 extraction and ran on an agarose gel to verify that a proper chromatin size of 200-400 bp was  
584 obtained.

585 For ChIP, 100 µl of chromatin preparation (corresponding to 50 embryos) was mixed with 100 µl IP-  
586 buffer (50 mM Tris-HCL pH 7.5, 100 mM NaCl, 2 mM EDTA, 1% NP-40, 1x cComplete EDTA-free  
587 protease inhibitor cocktails from Sigma) and antibody (for details on antibodies used see  
588 Supplementary Table S3) and incubated overnight at 4°C on a rotating wheel. For  
589 immunoprecipitation, 20 µl of protein G magnetic beads (Invitrogen, 1003D) were washed in IP  
590 buffer and then incubated with the chromatin mix for 2 hours at 4°C on a rotating wheel. Samples

591 were washed in 500  $\mu$ l washing buffer 1 (IP-buffer + 0.1% Sodium Deoxycholate), followed by  
592 washing in washing buffer 2 (washing buffer 1 + 400mM NaCl), washing buffer 3 (washing buffer 1 +  
593 250mM LiCl), washing buffer 1 and a final wash in 250  $\mu$ l of TE buffer. All washes were 5 minutes at  
594 4°C on a rotating wheel. Chromatin was eluted from the beads by incubation in 100  $\mu$ l of elution  
595 buffer (50 mM NaHCO<sub>3</sub> pH 8.8, 1% SDS) for 15 minutes at 65°C at 900 rpm in a thermomixer. The  
596 supernatant was transferred in a clean 1.5 ml tube. Elution was repeated a second time and both  
597 supernatants were pooled. The eluate was treated with 0.33  $\mu$ g/ $\mu$ l RNaseA for 2 hours at 37°C.  
598 Samples were then decrosslinked by adding 10  $\mu$ l of 4M NaCl and 1  $\mu$ l of 10mg/ml proteinase K and  
599 incubated overnight at 65°C. DNA was then purified using MinElute Reaction Clean-Up kit (Qiagen,  
600 28204).

601 1-5 ng of DNA was used to prepare libraries with the KAPA Hyper Prep Kit (KAPABiosystems, KK8504)  
602 and NEXTflex CHIP-Seq Barcodes for Illumina (Bioo Scientific, 514122) followed by paired-end 43bp  
603 sequencing on an Illumina NextSeq500 platform. All ChIP-seq were performed in two biological  
604 replicates, except for Rnf2 in wildtype embryos which was performed once and H3K27ac which was  
605 performed in triplicate in both wildtype and mutant embryos.

606

### 607 **RNA-sequencing**

608 Ten to twenty manually dechorionated 24 hpf embryos of a germline mutant incross and a germline  
609 wildtype incross were homogenized in TRIzol (Ambion, 15596018). Subsequently, the Quick RNA  
610 microprep kit (Zymo Research, R1051) was used to isolate RNA and treat the samples with DNaseI.  
611 Most samples were depleted from rRNA using the Ribo-Zero rRNA Removal Kit (Illumina,  
612 MRZH11124), followed by fragmentation, cDNA synthesis, and libraries were generated using the  
613 KAPA Hyper Prep Kit (KAPABiosystems, KK8504). Sequencing libraries were paired-end sequenced  
614 (43 bp read-length) on an Illumina NextSeq500 platform. However, two samples per genotype were  
615 generated with the TruSeq Stranded Total RNA Library Prep Kit with Ribo-Zero (Illumina, RS-122-

616 2201) and single-end sequenced (50 bp read-length) on an Illumina HiSeq 2500. For wildtype and  
617 *MZezh2* mutant embryos, 6 and 7 biological replicates were used, respectively.

618

### 619 **Mass spectrometry**

620 At 24 hpf, 50 embryos were collected, dechorionated, and resuspended by gently pipetting in 500  $\mu$ l  
621 deysolking buffer (1/2 Ginzburg Fish Ringer without Calcium: 55 mM NaCl, 1.8 mM KCl, 1.25 mM  
622 NaHCO<sub>3</sub>, 1x cOmplete EDTA-free protease inhibitor cocktail from Sigma) and incubated for 5  
623 minutes in a Thermomixer at RT at 1,100 rpm to disrupt the yolk. The samples were then centrifuged  
624 for 30 seconds at 400 g and the pellet was washed two times in 0.5 ml wash buffer (110 mM NaCl,  
625 3.5 mM KCl, 2.7 mM CaCl<sub>2</sub>, 10mM Tris/Cl pH8.5, 1x cOmplete EDTA-free protease inhibitor cocktail  
626 from Sigma) for 2 minutes in a Thermomixer at RT and 1,100 rpm, followed by 30 seconds  
627 centrifugation at 400 g. Washed pellets were lysed in 100  $\mu$ l RIPA buffer (50 mM Tris pH8.0, 150 mM  
628 NaCl, 0.1% SDS, 1% NP-40, 0.5% DOC, 20% glycerol, 1 mM Sodium Orthovanadate, 1x cOmplete  
629 EDTA-free protease inhibitor cocktails from Sigma) and sonicated for 2 cycles of 15s ON and 15s OFF  
630 on full power at 4°C on a Bioruptor (Diagenode). Samples were incubated for 1 hour on a rotating  
631 wheel at 4°C and centrifuged 10 minutes at 12,000 g and 4°C. Supernatant was flash frozen and  
632 stored at -80°C. After Bradford analysis, 100  $\mu$ g protein lysate was used for FASP-SAX as previously  
633 described(68). The peptide fractions were separated on an Easy nLC 1000 (Thermo Scientific)  
634 connected to a Thermo scientific Orbitrap Fusion Tribrid mass spectrometer. MS and MS/MS spectra  
635 were recorded in a top speed modus with a run cycle of 3s using Higher- energy Collision  
636 Dissociation (HCD) fragmentation. The raw mass spectrometry data were analyzed using the  
637 MAXQuant software version 1.6.0.1 (<http://www.ncbi.nlm.nih.gov/pubmed/19029910>) with default  
638 settings. Data was searched against the *Danio rerio* data base (UniProt June 2017). The experiment  
639 was performed with biological triplicates for each condition.

640

### 641 **Bioinformatics analyses**



642 For ChIP-sequencing analysis, fastq files were aligned to GRCz10 zebrafish genome version using  
643 BWA-MEM (version 0.7.10-r789) for paired-end reads(69). Duplicated and multimapping reads were  
644 removed using samtools(70) version 1.2 and Picard tools (<http://broadinstitute.github.io/picard>)  
645 version 2.14.1. MACS2(71) version 2.1.1 was used to call peaks from each aligned bam files using an  
646 Input track from 24 hpf wild-type embryos as control sequence. Peaks separated by less than 1kb  
647 distance were merged, peaks that were called using Input alone were removed from all data sets  
648 using bedtools suit version 2.20.1, and the intersection between the two replicates for each  
649 antibody in each condition was used to define the definitive peak sets. For visualization, fastq files  
650 from duplicate ChIP-sequencing were merged, aligned as described above, and transformed into  
651 bigwig alignment files using bam2bw version 1.25. Peak lists were analyzed using bedtools and  
652 heatmaps were produced using deepTools plotHeatmap(72) version 2.5.3.

653 For RNA-sequencing analysis, read counts per gene were retrieve using GeneCounts quantification  
654 method from STAR(73) version 2.4.0 and the GRCz10 zebrafish genome version with Ensembl  
655 annotation version 87 as reference. Differential expression analysis was calculated with DESeq2(74)  
656 version 1.14.1.

657 For proteomics analysis, differential expression of protein between conditions was assessed with  
658 DEP(75) version 1.2.0.

659 Gene Ontology analyses on selected genes were performed using DAVID bioinformatics  
660 resources(76) version 6.8 and anatomical term enrichment was done using ZEOGS(77). GSEA were  
661 performed with the GSEA software from the Broad Institute(35, 36) version 3.0. To analyze the  
662 proteomics data, a pre-ranked list was generated by z-scoring the proteins based on their log<sub>2</sub>FC  
663 calculated with DEP. Only proteins with an Ensembl accession number were consider for further  
664 analyses.

665

666 **Whole mount *in situ* hybridization**

667 Embryos at 24 hpf were dechorionated and fixed overnight at 4°C in 4% PFA in PBST (0.1% Tween),  
668 after which they were gradually transferred to 100% methanol. Prior to ISH, embryos were gradually  
669 transferred back to PBST and, subsequently, ISH was performed as described previously(78). The  
670 embryos were imaged by light microscopy on a Leica MZFLIII, equipped with a DFC450 camera.

671

#### 672 **RT-qPCR analyses**

673 Total RNA was isolated using Trizol from 20 flash-frozen dechorionated 24 hpf wildtype and *MZezh2*  
674 mutant embryos cut in two with tweezers. Reverse transcription was achieved using Superscript III  
675 (Invitrogen, 18080093) and poly-dT primers. Standard qPCR using SYBR Green (iQ SYBR Green  
676 Supermix, BioRad, 1708880) was performed using the primers shown in Supplementary Table S2.  
677 Relative expression was calculated based on expression of housekeeping genes *β-actin*. Calculations  
678 were based on at least 3 independent replicates for both conditions.

679

#### 680 **Data availability**

681 The sequencing data have been submitted to the NCBI Gene Expression Omnibus (GEO;  
682 <http://www.ncbi.nlm.nih.gov/geo/>) under accession number GSE119070. The mass spectrometry  
683 proteomics data have been deposited to the ProteomeXchange Consortium via the PRIDE(79)  
684 partner repository with the dataset identifier PXD010922. Reviewers can obtain access to the  
685 datasets via login information provided to the editor.

686

687

#### 688 **Acknowledgements**

689 We thank J. Bakkers, from the Hubrecht Institute, for providing the *tbx2a*, *tbx2b*, *tbx3a*, *tbx5a*, and  
690 *is/1* plasmids and J. den Hertog from the Hubrecht Institute for providing the *gsc* plasmid for ISH  
691 probe generation. We thank T. Spanings and A. van der Horst from the Radboud University for  
692 excellent zebrafish husbandry and E. Janssen-Megens from the Radboud University for excellent

693 technical support. We thank R. Lindeboom, from the Radboud University, for computational advice.  
694 We thank Dr. G.J.C. Veenstra, from the Radboud University, and his team for fruitful discussions. We  
695 thank Dr. R. Knight, from the King's College London, for his help with ISH analysis. The work was  
696 funded by the Innovative Research scheme of the Netherlands Organisation for Scientific research  
697 ([www.nwo.nl](http://www.nwo.nl), NWO-Vidi 864.12.009, NWO-Meervoud 836.13.003 L.M.K.), the Radboud University  
698 Nijmegen Medical Centre tenure track fellowship ([www.radboudumc.nl](http://www.radboudumc.nl), L.M.K.), the European  
699 Union's Horizon 2020 research and innovation programme under the Marie Skłodowska-Curie Grant  
700 (Agreement No. 705939, K.A.), the Howard Hughes Medical Institute and the Huntsman Cancer  
701 Institute core facilities (CA24014, B.R.C.), and the Eunice Kennedy Shriver National Institute of Child  
702 Health and Human Development of the NIH (T32HD007491, P.J.M.).

703

704

705

#### 706 **Authors' contributions**

707 JR contributed to conception and design of the study, performed and analyzed experiments, and  
708 wrote and edited the manuscript. NDC contributed to conception and design of the study,  
709 performed RNA extraction and ISH imaging, and edited the manuscript. MA performed library  
710 preparation and RT-qPCR. KA performed Western blot experiments, acquired funding, and edited  
711 the manuscript. DME assisted with bioinformatics analyses and edited the manuscript. PJM and BRC  
712 performed RNA-seq experiments and analysis, acquired funding, and edited the manuscript. PWTCJ  
713 and MV performed proteomics experiments and analysis and edited the manuscript. LMK  
714 contributed to conception and design of the study, performed experiments, acquired funding, and  
715 wrote and edited the manuscript.

716

717

#### 718 **Competing interests**

719 The authors declare no competing interests.

720

721

## 722 **References**

723 1. Brock HW, Fisher CL. Maintenance of gene expression patterns. *Developmental*  
724 *dynamics* : an official publication of the American Association of Anatomists. 2005;232(3):633-55.

725 2. Zhu P, Li G. Structural insights of nucleosome and the 30-nm chromatin fiber.  
726 *Current opinion in structural biology*. 2016;36:106-15.

727 3. Li G, Reinberg D. Chromatin higher-order structures and gene regulation. *Current*  
728 *opinion in genetics & development*. 2011;21(2):175-86.

729 4. Kennison JA. The Polycomb and trithorax group proteins of *Drosophila*: trans-  
730 regulators of homeotic gene function. *Annual review of genetics*. 1995;29:289-303.

731 5. Schuettengruber B, Bourbon HM, Di Croce L, Cavalli G. Genome Regulation by  
732 Polycomb and Trithorax: 70 Years and Counting. *Cell*. 2017;171(1):34-57.

733 6. Chittock EC, Latwiel S, Miller TC, Muller CW. Molecular architecture of polycomb  
734 repressive complexes. *Biochemical Society transactions*. 2017;45(1):193-205.

735 7. Mikkelsen TS, Ku M, Jaffe DB, Issac B, Lieberman E, Giannoukos G, Alvarez P,  
736 Brockman W, Kim TK, Koche RP, Lee W, Mendenhall E, O'Donovan A, Presser A, Russ C, Xie X,  
737 Meissner A, Wernig M, Jaenisch R, Nusbaum C, et al. Genome-wide maps of chromatin state in  
738 pluripotent and lineage-committed cells. *Nature*. 2007;448(7153):553-60.

739 8. Margueron R, Li G, Sarma K, Blais A, Zavadil J, Woodcock CL, Dynlacht BD, Reinberg  
740 D. Ezh1 and Ezh2 maintain repressive chromatin through different mechanisms. *Molecular cell*.  
741 2008;32(4):503-18.

742 9. Shen X, Liu Y, Hsu YJ, Fujiwara Y, Kim J, Mao X, Yuan GC, Orkin SH. EZH1 mediates  
743 methylation on histone H3 lysine 27 and complements EZH2 in maintaining stem cell identity and  
744 executing pluripotency. *Molecular cell*. 2008;32(4):491-502.

745 10. Gao Z, Zhang J, Bonasio R, Strino F, Sawai A, Parisi F, Kluger Y, Reinberg D. PCGF  
746 homologs, CBX proteins, and RYBP define functionally distinct PRC1 family complexes. *Molecular*  
747 *cell*. 2012;45(3):344-56.

748 11. Kloet SL, Makowski MM, Baymaz HI, van Voorthuijsen L, Karemaker ID, Santanach A,  
749 Jansen P, Di Croce L, Vermeulen M. The dynamic interactome and genomic targets of Polycomb  
750 complexes during stem-cell differentiation. *Nature structural & molecular biology*. 2016;23(7):682-  
751 90.

- 752 12. He J, Shen L, Wan M, Taranova O, Wu H, Zhang Y. Kdm2b maintains murine  
753 embryonic stem cell status by recruiting PRC1 complex to CpG islands of developmental genes.  
754 *Nature cell biology*. 2013;15(4):373-84.
- 755 13. Loubiere V, Delest A, Thomas A, Bonev B, Schuettengruber B, Sati S, Martinez AM,  
756 Cavalli G. Coordinate redeployment of PRC1 proteins suppresses tumor formation during *Drosophila*  
757 development. *Nature genetics*. 2016;48(11):1436-42.
- 758 14. Tavares L, Dimitrova E, Oxley D, Webster J, Poot R, Demmers J, Bezstarosti K, Taylor  
759 S, Ura H, Koide H, Wutz A, Vidal M, Elderkin S, Brockdorff N. RYBP-PRC1 complexes mediate H2A  
760 ubiquitylation at polycomb target sites independently of PRC2 and H3K27me3. *Cell*.  
761 2012;148(4):664-78.
- 762 15. Klymenko T, Muller J. The histone methyltransferases Trithorax and Ash1 prevent  
763 transcriptional silencing by Polycomb group proteins. *EMBO reports*. 2004;5(4):373-7.
- 764 16. Schmitges FW, Prusty AB, Faty M, Stutzer A, Lingaraju GM, Aiwazian J, Sack R, Hess  
765 D, Li L, Zhou S, Bunker RD, Wirth U, Bouwmeester T, Bauer A, Ly-Hartig N, Zhao K, Chan H, Gu J, Gut  
766 H, Fischle W, et al. Histone methylation by PRC2 is inhibited by active chromatin marks. *Molecular*  
767 *cell*. 2011;42(3):330-41.
- 768 17. Santos-Rosa H, Schneider R, Bannister AJ, Sherriff J, Bernstein BE, Emre NC,  
769 Schreiber SL, Mellor J, Kouzarides T. Active genes are tri-methylated at K4 of histone H3. *Nature*.  
770 2002;419(6905):407-11.
- 771 18. Creighton MP, Cheng AW, Welstead GG, Kooistra T, Carey BW, Steine EJ, Hanna J,  
772 Lodato MA, Frampton GM, Sharp PA, Boyer LA, Young RA, Jaenisch R. Histone H3K27ac separates  
773 active from poised enhancers and predicts developmental state. *Proceedings of the National*  
774 *Academy of Sciences of the United States of America*. 2010;107(50):21931-6.
- 775 19. O'Carroll D, Erhardt S, Pagani M, Barton SC, Surani MA, Jenuwein T. The polycomb-  
776 group gene *Ezh2* is required for early mouse development. *Molecular and cellular biology*.  
777 2001;21(13):4330-6.
- 778 20. Faust C, Lawson KA, Schork NJ, Thiel B, Magnuson T. The Polycomb-group gene *eed*  
779 is required for normal morphogenetic movements during gastrulation in the mouse embryo.  
780 *Development*. 1998;125(22):4495-506.
- 781 21. Pasini D, Bracken AP, Jensen MR, Lazzerini Denchi E, Helin K. Suz12 is essential for  
782 mouse development and for EZH2 histone methyltransferase activity. *The EMBO journal*.  
783 2004;23(20):4061-71.
- 784 22. Voncken JW, Roelen BA, Roefs M, de Vries S, Verhoeven E, Marino S, Deschamps J,  
785 van Lohuizen M. *Rnf2* (*Ring1b*) deficiency causes gastrulation arrest and cell cycle inhibition.

- 786 Proceedings of the National Academy of Sciences of the United States of America. 2003;100(5):2468-  
787 73.
- 788 23. Lindeman LC, Andersen IS, Reiner AH, Li N, Aanes H, Ostrup O, Winata C, Mathavan  
789 S, Muller F, Alestrom P, Collas P. Prepatterning of developmental gene expression by modified  
790 histones before zygotic genome activation. *Developmental cell*. 2011;21(6):993-1004.
- 791 24. Murphy PJ, Wu SF, James CR, Wike CL, Cairns BR. Placeholder Nucleosomes Underlie  
792 Germline-to-Embryo DNA Methylation Reprogramming. *Cell*. 2018;172(5):993-1006 e13.
- 793 25. Potok ME, Nix DA, Parnell TJ, Cairns BR. Reprogramming the maternal zebrafish  
794 genome after fertilization to match the paternal methylation pattern. *Cell*. 2013;153(4):759-72.
- 795 26. Vastenhouw NL, Zhang Y, Woods IG, Imam F, Regev A, Liu XS, Rinn J, Schier AF.  
796 Chromatin signature of embryonic pluripotency is established during genome activation. *Nature*.  
797 2010;464(7290):922-6.
- 798 27. Dupret B, Volkel P, Vennin C, Toillon RA, Le Bourhis X, Angrand PO. The histone  
799 lysine methyltransferase Ezh2 is required for maintenance of the intestine integrity and for caudal  
800 fin regeneration in zebrafish. *Biochimica et biophysica acta*. 2017;1860(10):1079-93.
- 801 28. San B, Chrispijn ND, Wittkopp N, van Heeringen SJ, Lagendijk AK, Aben M, Bakkers J,  
802 Ketting RF, Kamminga LM. Normal formation of a vertebrate body plan and loss of tissue  
803 maintenance in the absence of ezh2. *Scientific reports*. 2016;6:24658.
- 804 29. Zhong Y, Ye Q, Chen C, Wang M, Wang H. Ezh2 promotes clock function and  
805 hematopoiesis independent of histone methyltransferase activity in zebrafish. *Nucleic acids*  
806 *research*. 2018;46(7):3382-99.
- 807 30. Ciruna B, Weidinger G, Knaut H, Thisse B, Thisse C, Raz E, Schier AF. Production of  
808 maternal-zygotic mutant zebrafish by germ-line replacement. *Proceedings of the National Academy*  
809 *of Sciences of the United States of America*. 2002;99(23):14919-24.
- 810 31. Le Faou P, Volkel P, Angrand PO. The zebrafish genes encoding the Polycomb  
811 repressive complex (PRC) 1. *Gene*. 2011;475(1):10-21.
- 812 32. Piunti A, Shilatifard A. Epigenetic balance of gene expression by Polycomb and  
813 COMPASS families. *Science*. 2016;352(6290):aad9780.
- 814 33. Rickels R, Shilatifard A. Enhancer Logic and Mechanics in Development and Disease.  
815 *Trends in cell biology*. 2018;28(8):608-30.
- 816 34. King AD, Huang K, Rubbi L, Liu S, Wang CY, Wang Y, Pellegrini M, Fan G. Reversible  
817 Regulation of Promoter and Enhancer Histone Landscape by DNA Methylation in Mouse Embryonic  
818 Stem Cells. *Cell reports*. 2016;17(1):289-302.

- 819 35. Mootha VK, Lindgren CM, Eriksson KF, Subramanian A, Sihag S, Lehar J, Puigserver P,  
820 Carlsson E, Ridderstrale M, Laurila E, Houstis N, Daly MJ, Patterson N, Mesirov JP, Golub TR, Tamayo  
821 P, Spiegelman B, Lander ES, Hirschhorn JN, Altshuler D, et al. PGC-1alpha-responsive genes involved  
822 in oxidative phosphorylation are coordinately downregulated in human diabetes. *Nature genetics*.  
823 2003;34(3):267-73.
- 824 36. Subramanian A, Tamayo P, Mootha VK, Mukherjee S, Ebert BL, Gillette MA,  
825 Paulovich A, Pomeroy SL, Golub TR, Lander ES, Mesirov JP. Gene set enrichment analysis: a  
826 knowledge-based approach for interpreting genome-wide expression profiles. *Proceedings of the*  
827 *National Academy of Sciences of the United States of America*. 2005;102(43):15545-50.
- 828 37. Mallo M, Alonso CR. The regulation of Hox gene expression during animal  
829 development. *Development*. 2013;140(19):3951-63.
- 830 38. Prince VE, Joly L, Ekker M, Ho RK. Zebrafish hox genes: genomic organization and  
831 modified colinear expression patterns in the trunk. *Development*. 1998;125(3):407-20.
- 832 39. Thisse BT, C. Fast Release Clones: A High Throughput Expression Analysis. ZFIN Direct  
833 Data Submission (<http://zfin.org>). 2004.
- 834 40. Ribeiro I, Kawakami Y, Buscher D, Raya A, Rodriguez-Leon J, Morita M, Rodriguez  
835 Esteban C, Izpisua Belmonte JC. Tbx2 and Tbx3 regulate the dynamics of cell proliferation during  
836 heart remodeling. *PloS one*. 2007;2(4):e398.
- 837 41. Tamura K, Yonei-Tamura S, Izpisua Belmonte JC. Differential expression of Tbx4 and  
838 Tbx5 in Zebrafish fin buds. *Mechanisms of development*. 1999;87(1-2):181-4.
- 839 42. Dyer C, Linker C, Graham A, Knight R. Specification of sensory neurons occurs  
840 through diverse developmental programs functioning in the brain and spinal cord. *Developmental*  
841 *dynamics : an official publication of the American Association of Anatomists*. 2014;243(11):1429-39.
- 842 43. Heisenberg CP, Brennan C, Wilson SW. Zebrafish aussicht mutant embryos exhibit  
843 widespread overexpression of ace (fgf8) and coincident defects in CNS development. *Development*.  
844 1999;126(10):2129-40.
- 845 44. Zhang R, Knapp M, Suzuki K, Kajioka D, Schmidt JM, Winkler J, Yilmaz O, Pleschka M,  
846 Cao J, Kockum CC, Barker G, Holmdahl G, Beaman G, Keene D, Woolf AS, Cervellione RM, Cheng W,  
847 Wilkins S, Gearhart JP, Sirchia F, et al. ISL1 is a major susceptibility gene for classic bladder exstrophy  
848 and a regulator of urinary tract development. *Scientific reports*. 2017;7:42170.
- 849 45. Chrispijn ND, Andralojc KM, Castenmiller C, Kamminga LM. Gene expression profile  
850 of a selection of Polycomb Group genes during zebrafish embryonic and germ line development.  
851 *PloS one*. 2018;13(7):e0200316.



- 852           46.     Sun XJ, Xu PF, Zhou T, Hu M, Fu CT, Zhang Y, Jin Y, Chen Y, Chen SJ, Huang QH, Liu TX,  
853     Chen Z. Genome-wide survey and developmental expression mapping of zebrafish SET domain-  
854     containing genes. *PLoS one*. 2008;3(1):e1499.
- 855           47.     White RJ, Collins JE, Sealy IM, Wali N, Dooley CM, Digby Z, Stemple DL, Murphy DN,  
856     Billis K, Hourlier T, Fullgrabe A, Davis MP, Enright AJ, Busch-Nentwich EM. A high-resolution mRNA  
857     expression time course of embryonic development in zebrafish. *eLife*. 2017;6.
- 858           48.     Hagarman JA, Motley MP, Kristjansdottir K, Soloway PD. Coordinate regulation of  
859     DNA methylation and H3K27me3 in mouse embryonic stem cells. *PLoS one*. 2013;8(1):e53880.
- 860           49.     Peters AH, Kubicek S, Mechtler K, O'Sullivan RJ, Derijck AA, Perez-Burgos L,  
861     Kohlmaier A, Opravil S, Tachibana M, Shinkai Y, Martens JH, Jenuwein T. Partitioning and plasticity of  
862     repressive histone methylation states in mammalian chromatin. *Molecular cell*. 2003;12(6):1577-89.
- 863           50.     Reddington JP, Perricone SM, Nestor CE, Reichmann J, Youngson NA, Suzuki M,  
864     Reinhardt D, Dunican DS, Prendergast JG, Mjoseng H, Ramsahoye BH, Whitelaw E, Greally JM, Adams  
865     IR, Bickmore WA, Meehan RR. Redistribution of H3K27me3 upon DNA hypomethylation results in de-  
866     repression of Polycomb target genes. *Genome biology*. 2013;14(3):R25.
- 867           51.     McGinnis W, Tickle C. Pattern formation and developmental mechanisms: good  
868     mileage from comparative studies in cell biology, gene regulation, development and evolution.  
869     *Current opinion in genetics & development*. 2005;15(4):355-7.
- 870           52.     Laursen KB, Mongan NP, Zhuang Y, Ng MM, Benoit YD, Gudas LJ. Polycomb  
871     recruitment attenuates retinoic acid-induced transcription of the bivalent NR2F1 gene. *Nucleic acids  
872     research*. 2013;41(13):6430-43.
- 873           53.     Zhang Y, Liang J, Li Q. Coordinated regulation of retinoic acid signaling pathway by  
874     KDM5B and polycomb repressive complex 2. *Journal of cellular biochemistry*. 2014;115(9):1528-38.
- 875           54.     Cunningham TJ, Zhao X, Sandell LL, Evans SM, Trainor PA, Duester G. Antagonism  
876     between retinoic acid and fibroblast growth factor signaling during limb development. *Cell reports*.  
877     2013;3(5):1503-11.
- 878           55.     Grandel H, Brand M. Zebrafish limb development is triggered by a retinoic acid signal  
879     during gastrulation. *Developmental dynamics : an official publication of the American Association of  
880     Anatomists*. 2011;240(5):1116-26.
- 881           56.     Lupo G, Liu Y, Qiu R, Chandraratna RA, Barsacchi G, He RQ, Harris WA. Dorsoventral  
882     patterning of the *Xenopus* eye: a collaboration of Retinoid, Hedgehog and FGF receptor signaling.  
883     *Development*. 2005;132(7):1737-48.



- 884           57.     Marsh-Armstrong N, McCaffery P, Gilbert W, Dowling JE, Drager UC. Retinoic acid is  
885 necessary for development of the ventral retina in zebrafish. *Proceedings of the National Academy*  
886 *of Sciences of the United States of America*. 1994;91(15):7286-90.
- 887           58.     Maves L, Kimmel CB. Dynamic and sequential patterning of the zebrafish posterior  
888 hindbrain by retinoic acid. *Developmental biology*. 2005;285(2):593-605.
- 889           59.     White RJ, Nie Q, Lander AD, Schilling TF. Complex regulation of *cyp26a1* creates a  
890 robust retinoic acid gradient in the zebrafish embryo. *PLoS biology*. 2007;5(11):e304.
- 891           60.     Samarut E, Fraher D, Laudet V, Gibert Y. ZebRA: An overview of retinoic acid  
892 signaling during zebrafish development. *Biochimica et biophysica acta*. 2015;1849(2):73-83.
- 893           61.     van der Velden YU, Wang L, van Lohuizen M, Haramis AP. The Polycomb group  
894 protein *Ring1b* is essential for pectoral fin development. *Development*. 2012;139(12):2210-20.
- 895           62.     Joubin K, Stern CD. Molecular interactions continuously define the organizer during  
896 the cell movements of gastrulation. *Cell*. 1999;98(5):559-71.
- 897           63.     Stachel SE, Grunwald DJ, Myers PZ. Lithium perturbation and gooseoid expression  
898 identify a dorsal specification pathway in the pregastrula zebrafish. *Development*. 1993;117(4):1261-  
899 74.
- 900           64.     Westerfield M. *The zebrafish book. A guide for the laboratory use of zebrafish*  
901 *(Danio rerio)*. 4th ed., Univ. of Oregon Press, Eugene. 2000.
- 902           65.     Kimmel CB, Ballard WW, Kimmel SR, Ullmann B, Schilling TF. Stages of embryonic  
903 development of the zebrafish. *Developmental dynamics : an official publication of the American*  
904 *Association of Anatomists*. 1995;203(3):253-310.
- 905           66.     Pauls S, Geldmacher-Voss B, Campos-Ortega JA. A zebrafish histone variant H2A.F/Z  
906 and a transgenic H2A.F/Z:GFP fusion protein for in vivo studies of embryonic development.  
907 *Development genes and evolution*. 2001;211(12):603-10.
- 908           67.     Krovel AV, Olsen LC. Expression of a *vas::EGFP* transgene in primordial germ cells of  
909 the zebrafish. *Mechanisms of development*. 2002;116(1-2):141-50.
- 910           68.     Wisniewski JR, Ostasiewicz P, Mann M. High recovery FASP applied to the proteomic  
911 analysis of microdissected formalin fixed paraffin embedded cancer tissues retrieves known colon  
912 cancer markers. *Journal of proteome research*. 2011;10(7):3040-9.
- 913           69.     Li H, Durbin R. Fast and accurate short read alignment with Burrows-Wheeler  
914 transform. *Bioinformatics*. 2009;25(14):1754-60.
- 915           70.     Li H, Handsaker B, Wysoker A, Fennell T, Ruan J, Homer N, Marth G, Abecasis G,  
916 Durbin R, Genome Project Data Processing S. The Sequence Alignment/Map format and SAMtools.  
917 *Bioinformatics*. 2009;25(16):2078-9.

- 918           71.     Zhang Y, Liu T, Meyer CA, Eeckhoute J, Johnson DS, Bernstein BE, Nusbaum C, Myers  
919     RM, Brown M, Li W, Liu XS. Model-based analysis of ChIP-Seq (MACS). *Genome biology*.  
920     2008;9(9):R137.
- 921           72.     Ramirez F, Ryan DP, Gruning B, Bhardwaj V, Kilpert F, Richter AS, Heyne S, Dundar F,  
922     Manke T. deepTools2: a next generation web server for deep-sequencing data analysis. *Nucleic acids*  
923     *research*. 2016;44(W1):W160-5.
- 924           73.     Dobin A, Davis CA, Schlesinger F, Drenkow J, Zaleski C, Jha S, Batut P, Chaisson M,  
925     Gingeras TR. STAR: ultrafast universal RNA-seq aligner. *Bioinformatics*. 2013;29(1):15-21.
- 926           74.     Love MI, Huber W, Anders S. Moderated estimation of fold change and dispersion  
927     for RNA-seq data with DESeq2. *Genome biology*. 2014;15(12):550.
- 928           75.     Zhang X, Smits AH, van Tilburg GB, Ovaa H, Huber W, Vermeulen M. Proteome-wide  
929     identification of ubiquitin interactions using UbIA-MS. *Nature protocols*. 2018;13(3):530-50.
- 930           76.     Huang da W, Sherman BT, Lempicki RA. Systematic and integrative analysis of large  
931     gene lists using DAVID bioinformatics resources. *Nature protocols*. 2009;4(1):44-57.
- 932           77.     Prykhozhij SV, Marsico A, Meijsing SH. Zebrafish Expression Ontology of Gene Sets  
933     (ZEOGS): a tool to analyze enrichment of zebrafish anatomical terms in large gene sets. *Zebrafish*.  
934     2013;10(3):303-15.
- 935           78.     Houwing S, Kamminga LM, Berezikov E, Cronembold D, Girard A, van den Elst H,  
936     Filippov DV, Blaser H, Raz E, Moens CB, Plasterk RH, Hannon GJ, Draper BW, Ketting RF. A role for  
937     Piwi and piRNAs in germ cell maintenance and transposon silencing in Zebrafish. *Cell*.  
938     2007;129(1):69-82.
- 939           79.     Vizcaino JA, Csordas A, del-Toro N, Dianes JA, Griss J, Lavidas I, Mayer G, Perez-  
940     Riverol Y, Reisinger F, Ternent T, Xu QW, Wang R, Hermjakob H. 2016 update of the PRIDE database  
941     and its related tools. *Nucleic acids research*. 2016;44(D1):D447-56.

942

943 **Supplementary Figure Legends**

944

945 **Supplementary Fig. 1. Analysis of Ezh2, H3K27me3, and Rnf2 binding in wildtype and *MZezh2***  
946 **mutant (*MZezh2*<sup>-/-</sup>) embryos at 24 hpf. (A)** Venn diagrams presenting the overlap between Ezh2  
947 (blue) and H3K27me3 (red) and between Ezh2 (blue) and Rnf2 (purple) peaks detected in 24 hpf  
948 wildtype embryos. **(B)** UCSC browser snapshots of three genomic loci depicting Ezh2, H3K27me3,  
949 and Rnf2 binding after CHIP-seq in *MZezh2*<sup>-/-</sup> embryos compared to wildtype embryos at 24 hpf.  
950 Colors represent CHIP-seq for different proteins with blue: Ezh2, red: H3K27me3, purple: Rnf2, and  
951 grey: Input control. **(C)** UCSC browser snapshots of two genomic loci (chr13:1,134,029-1,134,242 and  
952 chr13:40,038,792-40,038,959) representative of a-specific binding present on repeat regions for all  
953 tested epigenetic marks after CHIP-seq in *MZezh2*<sup>-/-</sup> and wildtype embryos at 24 hpf. Colors are as in  
954 **(A)**. **(D)** Heatmaps for Ezh2, H3K27me3, Rnf2, H3K4me3, and H3K27ac RPKM-normalized coverage  
955 after CHIP-seq in 24 hpf wildtype embryos. Windows of 20 kb regions at all H3K27me3 and Ezh2  
956 peaks in 24 hpf wildtype embryos are shown. An input track obtained from 24 hpf wildtype embryos  
957 was used as control. Colors are as in **(A)**. **(E)** Example of *ezh2*<sup>(hu5670)</sup> genotyping results after nested  
958 PCR, RsaI restriction, and gel electrophoresis in *MZezh2* wildtype (*MZezh2*<sup>+/+</sup>), *MZezh2* heterozygous  
959 (*MZezh2*<sup>+/-</sup>), and *MZezh2* mutant (*MZezh2*<sup>-/-</sup>) embryos.

960

961 **Supplementary Fig. 2. Decrease of H3K27ac binding in *MZezh2* mutant (*MZezh2*<sup>-/-</sup>) embryos at 24**  
962 **hpf. (A)** Number of peaks called after H3K27ac CHIP-seq in wildtype and *MZezh2*<sup>-/-</sup> embryos at 24  
963 hpf. Dark and light blue boxes show peaks detected in both wildtype and *MZezh2*<sup>-/-</sup> embryos or  
964 specific to one condition, respectively. Each peak set was obtained by the intersection of at least two  
965 out of three independent replicates. Dark and light blue represent peaks shared by the two  
966 conditions and specific from one condition, respectively. **(B)** Box plots of H3K27ac3 RPKM-  
967 normalized coverage after CHIP-seq in wildtype and in *MZezh2*<sup>-/-</sup> embryos at 24 hpf. The input  
968 control was obtained from wildtype embryos at 24 hpf. Coverages were calculated based on

969 enriched peaks detected in both wildtype and *MZezh2*<sup>-/-</sup> embryos (shared), specific for *MZezh2*<sup>-/-</sup>  
970 embryos, and specific for wildtype embryos. Colors are as in (a). t-test: \*\*\* *P*-value < 0.001.

971

972 **Supplementary Fig. 3. RNA-seq and proteomics analysis in *MZezh2* mutant (*MZezh2*<sup>-/-</sup>) embryos at**  
973 **24 hpf. (A)** Analysis of anatomical terms associated with genes upregulated and downregulated in  
974 *MZezh2*<sup>-/-</sup> embryos compared to wildtype embryos at 24 hpf. **(B)** Schematic representation of  
975 changes in protein expression level of PRC2 (left) and canonical PRC1 (right) subunits in *MZezh2*<sup>-/-</sup>  
976 compared to wildtype embryos at 24 hpf. Dark red: log<sub>2</sub>fold-change ≥ 1 and *P*-value ≤ 0.05, light red:  
977 log<sub>2</sub>fold-change ≥ 0, turquoise: log<sub>2</sub>fold-change ≤ 0, grey: protein not detected.
